# Supplementary material for: Validation of the German Life-Space Assessment (LSA-D): cross-sectional validation study in urban and rural community-dwelling older adults
Source: PubMed Central journal article supplement (PMC8261868; doi:10.1136/bmjopen-2021-049926), 2021-07-06
Supplement: bmjopen-2021-049926.draft_revisions.pdf [file bmjopen-2021-049926.draft_revisions.pdf]

# BMJ Open

BMJ Open is committed to open peer review. As part of this commitment we make the peer review history of every article we publish publicly available.

When an article is published we post the peer reviewers' comments and the authors' responses online. We also post the versions of the paper that were used during peer review. These are the versions that the peer review comments apply to.

The versions of the paper that follow are the versions that were submitted during the peer review process. They are not the versions of record or the final published versions. They should not be cited or distributed as the published version of this manuscript.

BMJ Open is an open access journal and the full, final, typeset and author-corrected version of record of the manuscript is available on our site with no access controls, subscription charges or pay-per-view fees (<http://bmjopen.bmj.com>).

If you have any questions on BMJ Open's open peer review process please email [info.bmjopen@bmj.com](mailto:info.bmjopen@bmj.com)

# BMJ Open

## Validation of the German version of the Life-Space Assessment LSA-D

|                               |                                                                                                                                                                                                                                                                                                                                                                                                                                                                                                                                                                                                                                |
|-------------------------------|--------------------------------------------------------------------------------------------------------------------------------------------------------------------------------------------------------------------------------------------------------------------------------------------------------------------------------------------------------------------------------------------------------------------------------------------------------------------------------------------------------------------------------------------------------------------------------------------------------------------------------|
| Journal:                      | <i>BMJ Open</i>                                                                                                                                                                                                                                                                                                                                                                                                                                                                                                                                                                                                                |
| Manuscript ID                 | bmjopen-2021-049926                                                                                                                                                                                                                                                                                                                                                                                                                                                                                                                                                                                                            |
| Article Type:                 | Original research                                                                                                                                                                                                                                                                                                                                                                                                                                                                                                                                                                                                              |
| Date Submitted by the Author: | 10-Feb-2021                                                                                                                                                                                                                                                                                                                                                                                                                                                                                                                                                                                                                    |
| Complete List of Authors:     | Mümken, Sandra Angelika; Charité Universitätsmedizin Berlin, 1 Institute of Medical Sociology and Rehabilitation Science<br>Gellert, Paul; Charité Universitätsmedizin Berlin, Institute of Medical Sociology and Rehabilitation Science<br>Stollwerck, Malte; Charite Universitätsmedizin Berlin, Institute of Medical Sociology and Rehabilitation Science<br>O'Sullivan, Julie Lorraine; Charite Universitätsmedizin Berlin, Institute of Medical Sociology and Rehabilitation Science<br>Kiselev, Joern; Charite Universitätsmedizin Berlin, Department of Anesthesiology and Operative Intensive Care Medicine (CCM, CVK) |
| Keywords:                     | Rehabilitation medicine < INTERNAL MEDICINE, GERIATRIC MEDICINE, SOCIAL MEDICINE                                                                                                                                                                                                                                                                                                                                                                                                                                                                                                                                               |
|                               |                                                                                                                                                                                                                                                                                                                                                                                                                                                                                                                                                                                                                                |

SCHOLARONE™  
Manuscripts

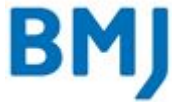

I, the Submitting Author has the right to grant and does grant on behalf of all authors of the Work (as defined in the below author licence), an exclusive licence and/or a non-exclusive licence for contributions from authors who are: i) UK Crown employees; ii) where BMJ has agreed a CC-BY licence shall apply, and/or iii) in accordance with the terms applicable for US Federal Government officers or employees acting as part of their official duties; on a worldwide, perpetual, irrevocable, royalty-free basis to BMJ Publishing Group Ltd ("BMJ") its licensees and where the relevant Journal is co-owned by BMJ to the co-owners of the Journal, to publish the Work in this journal and any other BMJ products and to exploit all rights, as set out in our [licence](#).

The Submitting Author accepts and understands that any supply made under these terms is made by BMJ to the Submitting Author unless you are acting as an employee on behalf of your employer or a postgraduate student of an affiliated institution which is paying any applicable article publishing charge ("APC") for Open Access articles. Where the Submitting Author wishes to make the Work available on an Open Access basis (and intends to pay the relevant APC), the terms of reuse of such Open Access shall be governed by a Creative Commons licence – details of these licences and which [Creative Commons](#) licence will apply to this Work are set out in our licence referred to above.

Other than as permitted in any relevant BMJ Author's Self Archiving Policies, I confirm this Work has not been accepted for publication elsewhere, is not being considered for publication elsewhere and does not duplicate material already published. I confirm all authors consent to publication of this Work and authorise the granting of this licence.

## Validation of the German version of the Life-Space Assessment LSA-D

Sandra A. Mümken<sup>1</sup>

Paul Gellert<sup>1</sup>

Malte Stollwerck<sup>1</sup>

Julie L. O'Sullivan<sup>1</sup>

Jörn Kiselev<sup>2</sup>

<sup>1</sup> *Institute of Medical Sociology and Rehabilitation Science, Charité – Universitätsmedizin Berlin, Germany, corporate member of Freie Universität Berlin, Humboldt-Universität zu Berlin, and Berlin Institute of Health, Charitéplatz 1, D-10117 Berlin, Germany*

<sup>2</sup> *Department of Anesthesiology and Operative Intensive Care Medicine (CCM, CVK), Charité Universitätsmedizin Berlin, corporate member of Freie Universität Berlin, Humboldt-Universität zu Berlin, and Berlin Institute of Health, Charitéplatz 1, D-10117 Berlin, Germany*

*Corresponding author:*

Sandra A. Mümken

Institute of Medical Sociology and Rehabilitation Science

Charitéplatz 1 10117 Berlin

sandra.muemken@charite.de

Wordcount:3.995

**Abstract**

**Objectives** To develop a German version of the original University of Alabama at Birmingham (UAB) Study of Aging Life-Space Assessment (LSA-D) for measurement of community mobility in older adults within the past 4 weeks and to evaluate its psychometric properties for urban and rural populations of older adults.

**Design** Cross-sectional validation study.

**Setting** Two study centres in urban and rural German outpatient hospital settings.

**Participants** In total N=83 community-dwelling older adults were recruited (n=40 from urban and n=43 from rural areas; mean age was 78.5 (SD=5.4); 49% male).

**Primary and secondary outcome measures** The final version of the translated LSA-D was related with questions about activities and instrumental activities of daily living (ADL/iADL; primary hypothesis), Timed-Up&Go-Test (TUG), self-rated health, balance confidence and history of falls and sociodemographic factors to obtain construct validity. Secondary outcome measures of health included handgrip strength, screening of cognitive function, comorbidities and use of transportation. To assess construct validity, correlations between LSA-D and all primary outcome measures were examined for total sample, urban and rural subsamples using bivariate regression and multiple adjusted regression models. Posthoc analyses included different LSA-D scoring methods for each region. All parameters were estimated using non-parametric bootstrapping procedure.

**Results** In the multiple adjusted model for the total sample, number of ADL/iADL limitations ( $\beta=-.26$ ; 95%CI=-.42/-.08), TUG ( $\beta=-.37$ ; 95%CI=-.68/-.14), living in shared living arrangements ( $\beta=.22$ ; 95%CI=.01/.44) and history of falls in the past 6 months ( $\beta=-.22$ ; 95%CI=-.41/-.05) showed significant associations with the LSA-D composite score, while living in urban area ( $\beta=-.19$ ; 95%CI=-.42/.03) and male gender ( $\beta=.15$ ; 95%CI=-.04/.35) were not significant.

1  
2  
3 **Conclusion** The LSA-D is a valid tool for measuring life-space mobility in German  
4 community-dwelling older adults within the past four weeks in ambulant urban and rural  
5 settings.  
6  
7  
8  
9

10  
11  
12 **Trial registration number** DRKS00019023  
13

14  
15  
16 *Keywords:* Older adults; Mobility; Life-space; German; Validation; living environment;  
17 geriatrics,  
18  
19

### 20 21 22 23 **Strengths and limitations of this study**

- 24  
25  
26  
27 • German validation of the original UAB Life-Space Assessment (LSA-D) for community  
28 dwelling older adults in urban and rural settings  
29
- 30  
31  
32 • Using bootstrapped bivariate and multiple adjusted regression models to attain construct  
33 validity of the LSA-D  
34
- 35  
36  
37 • Recruitment had to be stopped shortly before reaching the calculated sample size due to the  
38 decision to restrict in face-to-face research to contain the outbreak of the Covid-19  
39 pandemic in March 2020  
40  
41  
42  
43  
44  
45  
46  
47  
48  
49  
50  
51  
52  
53  
54  
55  
56  
57  
58  
59  
60

## Introduction

Mobility, defined as “the ability to move oneself (either independently or by using assistive devices or transportation) within environments that expand from one’s home to the neighbourhood and regions beyond”[1] encompasses general independence, opportunities for social activities and freedom to experience new sites. This broad concept of mobility goes beyond the narrow conception of mobility as performance in a single functional test without considering environmental barriers and social resources although their impact on mobility has been investigated.[2, 3] Therefore, the focus on single functional mobility tests can lead to misconceptions about actual mobility performance in everyday life and health practitioners may oversee possible consequences for social participation and mental health.[4]

To overcome these shortcomings of functional mobility assessments, recent studies of mobility and aging operationalize mobility as circled areas, so-called life-spaces, that spread from the centre of one’s own house and garden to the neighbourhood, the city lived in and beyond, with each life-space offering different opportunities for social involvement, recreational activities or access to medical care.[5, 6] The application of self-reported life-spaces to determine mobility of older adults was first established by May et al. in 1985[7] and assessment of life-space mobility with standardized questionnaires was recently recommended for geriatric research.[8] Several instruments for measuring life-space mobility in specific populations and settings exist, including assessments of life-space within one’s own residence for home-bound individuals[9] or residents in nursing homes and other institutions.[10, 11]

One of the most frequently applied instruments for measurement of mobility in older adults using the life-space concept is the validated Life-Space Assessment (LSA) by Baker et al.[12] as part of the University of Alabama at Birmingham (UAB). Study of Aging. The LSA provides health professionals in geriatric settings with information on availability of environmental and

1  
2  
3 social resources as an outcome of mobility assessment and gives them a more comprehensive  
4  
5 picture of the patient's needs.  
6

7 The importance of the LSA for clinical practice has been shown in various studies. Kennedy et  
8  
9 al.[13] for instance found that a decline in life-space over six months is associated with greater  
10  
11 mortality in the following six months. Limitations in life-space mobility are associated with  
12  
13 long-term mortality of older men[14], cognitive decline[15], risk of falls[16], frailty[17] and  
14  
15 hospital admission in older adults with heart failure.[18] Furthermore, the concept has already  
16  
17 been established in outpatient physical therapy with various community-dwelling neurological  
18  
19 orthopaedic and surgery patients.[19] Additionally, psychological health factors like external  
20  
21 control believes[20] and personal activity goals[21] influence life-space mobility. Therefore,  
22  
23 the LSA can also supplement evaluation concepts in psychological research and treatment of  
24  
25 older adults. The construct validity of the LSA was commonly tested by relating the LSA to  
26  
27 activities an instrumental activities of daily living (ADL/iADL) but also self-rated health and  
28  
29 fears of falling.[22, 23, 24] Moreover, as Baker et al.[12] pointed out, there is a need to validate  
30  
31 the LSA in urban and rural settings. As part of validity testing, the LSA has been translated into  
32  
33 multiple languages such as Chinese[25], French[24], Spanish[22], Swedish[26] or Danish[27].  
34  
35 To date, two modified German versions for assessment of life-space mobility in specific  
36  
37 populations of older adults exist: One for those with mild cognitive impairment (LSA-CI)[23]  
38  
39 that captures life-space of the past week and one for those in institutionalized settings where  
40  
41 life-spaces are adapted to the living environment of care facilities (LSA-IS).[11] However, a  
42  
43 validated and intercultural adapted version of the original LSA that can be administered in the  
44  
45 context of a more general geriatric setting in the overall population of community-dwelling  
46  
47 older adults is still missing. Therefore, we conducted a validation study of a German version of  
48  
49 the original LSA the  
50  
51 (LSA-D) in urban and rural areas.  
52  
53  
54  
55  
56  
57  
58  
59  
60



## Aims and Hypotheses

Our aim was to translate, apply and validate the LSA-D, a German version of the LSA from the University of Alabama (UAB) Study of Aging for the population of urban and rural community-dwelling older adults. In line with the original validation of the LSA we hypothesized a moderate association of the LSA-D composite score with limitations in ADL/iADL as primary hypothesis[12] Further, we assumed moderate associations with Timed-Up&Go-Test (TUG), self-rated health and history of falls. Finally, we expected the newly translated LSA-D to show these associations in both urban and rural populations of older adults.

## Methods

### Study design

A cross-sectional study design was used with two German hospital clinics as study centres. The first study centre was an ambulant geriatric rehabilitation facility of the Havelland clinics located in a small town (16,000 inhabitants) in Brandenburg, Germany. The second centre was based at the Charité – Universitätsmedizin Berlin within the Department of Anesthesiology and Operative Intensive Care. Approval for the study was given by the local Ethics Committee of the Charité – Universitätsmedizin Berlin (EA2/124/19) and the study was prospectively registered at the German Clinical Trials Register (DRKS00019023). Sample size calculation was based on assumptions to find a moderate-to-strong association of  $\beta/r = -0.40$ [12] between the LSA-D-composite score and ADL/iADL (i.e., primary hypothesis), functional mobility with TUG, self-rated health and balance confidence in all observed populations. For testing of the primary hypothesis, 92 participants or 46 subjects per setting (i.e., urban/rural) were required. This was based on the following assumptions: An effect size of Pearson's correlation coefficient or standardized beta coefficient of  $r/\beta = -0.40$  ( $\rho = -0.40$  in

1  
2  
3 the population) was assumed in reference to the association between the LSA composite score  
4 (LS-C) and ADL/iADL found in the original validation study of LSA.[12] The power  
5 calculation with GPower 3.1 for bivariate correlations (test family "exact")[28] resulted in an  
6 estimated minimum sample size of n=46 participants per setting (urban/rural) and a critical r=  
7 0.29 with a type I error rate of alpha=0.025 (test one-sided; corrected for multiple testing  
8 [setting urban/rural; alpha=0.05/2]) and a statistical power of 1-β=0.80. Recruitment took place  
9 from November 2019 to February 2020 and ended in March 2020 with a sample size of 82 due  
10 to restrictions of the then starting coronavirus pandemic. A post hoc sensitivity analysis  
11 suggests that we are still able to detect effects of r=-.30 and larger.  
12  
13  
14  
15  
16  
17  
18  
19  
20  
21  
22  
23  
24  
25

### 26 **Translation process**

27  
28 In accordance with the 2008 guidelines of the World Health Organization[29], forward  
29 translation into German language was separately conducted by two researchers who formulated  
30 two German versions that were discussed and then merged into one German pre-version of the  
31 LSA-D. The pre-version was given to two native English speakers for back translation. Again,  
32 both versions of the back translation were discussed by the two native speakers and a concerted  
33 version of the back-translation was produced. Differences between the original LSA and the  
34 concerted back-translation were discussed and reviewed with the original author of the LSA to  
35 redefine a pre-final version of the LSA-D that was pre-tested for understandability using  
36 cognitive interview technique among 4 older adults of the Charité – Universitätsmedizin Berlin  
37 to create the final LSA-D version.[30]  
38  
39  
40  
41  
42  
43  
44  
45  
46  
47  
48  
49  
50  
51  
52  
53  
54  
55  
56  
57  
58  
59  
60

## Participants and Recruitment

The 83 participants were divided into two groups based on the size of their place of residence. Participants from villages (< 5,000 inhabitants) and small towns (up to 40,000 inhabitants) were classified as living in rural areas. In contrast, participants who lived in the city of Berlin (3.8 million inhabitants) with its metropolitan infrastructure and services were classified as urban population. Inclusion criteria were defined as: age of 70 years and older; ability to read and understand the questionnaire and give written informed consent. Exclusion criteria were incidences that limited mobility within the past four weeks, severe cognitive limitations or mental conditions, need of acute care and insufficient understanding of the German language. In total, 126 persons were screened for eligibility of which 28 did not fulfil the inclusion criteria and 15 were unwilling to participate. In both study centres, participants were recruited during normal health care routine by trained study staff. All participants received verbal and written information on the study and were given time to consider participation before giving written consent.

## Measures

### *Sociodemographic measures*

Demographic variables (i.e., age, gender, height, weight, status of shared living-arrangements) use of public transportation and driving-status were assessed with a standardized questionnaire.

### *Primary outcome measures*

Selection of other primary and secondary variables for determining construct validity was based on the original validation study of the UAB and other LSA validation studies from different countries.[12, 22, 23, 24]

Life-space was evaluated with the translated German Version of the UAB Life-Space Assessment. The LSA consists of a questionnaire on five different life-spaces capturing six

## RUNNING HEAD: Life-Space Assessment, p. 9 of 28

1  
2  
3 possible levels of life-space (0. Mobility within the bedroom, 1. rooms inside the home besides  
4 the bedroom, 2. area outside the house, 3. neighbourhood, 4. town or city lived in, outside of  
5 the bedroom, 2. area outside the house, 3. neighbourhood, 4. town or city lived in, outside of  
6 town or city lived in). For each level, participants were asked a) if they went to this level in the  
7 past four weeks, b) if so, how often, c) if they needed assistive devices or special equipment to  
8 reach that level and d) if they needed personal help to reach that level.[12] Different scoring  
9 methods can be used with the LSA either indicating the maximum attained life-space level (LS-  
10 M), life-space that can be reached independently without any further support (LS-I), reachable  
11 life-space with possible use of equipment but without personal help (LS-E), dichotomized life-  
12 space (LS-D) that classifies a person's mobility into the ability to travel beyond the borders of  
13 their self-perceived neighbourhood and the composite score (LS-C) that summarizes the  
14 attained LS-level, needed equipment or personal support and frequency of visits. The LS-C  
15 score ranges from 0 to 120 points with higher scores indicating better mobility. As the LS-C  
16 score has shown a good sensitivity regarding change over time, it is frequently applied in  
17 longitudinal studies.[31, 32] In cross-sectional studies, LS-I and LS-D are additional scores for  
18 describing actual mobility and associations with other health factors.[12]

19  
20  
21  
22  
23  
24  
25  
26  
27  
28  
29  
30  
31  
32  
33  
34  
35  
36  
37  
38  
39  
40  
41  
42  
43  
44  
45  
46  
47  
48  
49  
50  
51  
52  
53  
54  
55  
56  
57  
58  
59  
60  
61  
62  
63  
64  
65  
66  
67  
68  
69  
70  
71  
72  
73  
74  
75  
76  
77  
78  
79  
80  
81  
82  
83  
84  
85  
86  
87  
88  
89  
90  
91  
92  
93  
94  
95  
96  
97  
98  
99  
100  
101  
102  
103  
104  
105  
106  
107  
108  
109  
110  
111  
112  
113  
114  
115  
116  
117  
118  
119  
120  
121  
122  
123  
124  
125  
126  
127  
128  
129  
130  
131  
132  
133  
134  
135  
136  
137  
138  
139  
140  
141  
142  
143  
144  
145  
146  
147  
148  
149  
150  
151  
152  
153  
154  
155  
156  
157  
158  
159  
160  
161  
162  
163  
164  
165  
166  
167  
168  
169  
170  
171  
172  
173  
174  
175  
176  
177  
178  
179  
180  
181  
182  
183  
184  
185  
186  
187  
188  
189  
190  
191  
192  
193  
194  
195  
196  
197  
198  
199  
200  
201  
202  
203  
204  
205  
206  
207  
208  
209  
210  
211  
212  
213  
214  
215  
216  
217  
218  
219  
220  
221  
222  
223  
224  
225  
226  
227  
228  
229  
230  
231  
232  
233  
234  
235  
236  
237  
238  
239  
240  
241  
242  
243  
244  
245  
246  
247  
248  
249  
250  
251  
252  
253  
254  
255  
256  
257  
258  
259  
260  
261  
262  
263  
264  
265  
266  
267  
268  
269  
270  
271  
272  
273  
274  
275  
276  
277  
278  
279  
280  
281  
282  
283  
284  
285  
286  
287  
288  
289  
290  
291  
292  
293  
294  
295  
296  
297  
298  
299  
300  
301  
302  
303  
304  
305  
306  
307  
308  
309  
310  
311  
312  
313  
314  
315  
316  
317  
318  
319  
320  
321  
322  
323  
324  
325  
326  
327  
328  
329  
330  
331  
332  
333  
334  
335  
336  
337  
338  
339  
340  
341  
342  
343  
344  
345  
346  
347  
348  
349  
350  
351  
352  
353  
354  
355  
356  
357  
358  
359  
360  
361  
362  
363  
364  
365  
366  
367  
368  
369  
370  
371  
372  
373  
374  
375  
376  
377  
378  
379  
380  
381  
382  
383  
384  
385  
386  
387  
388  
389  
390  
391  
392  
393  
394  
395  
396  
397  
398  
399  
400  
401  
402  
403  
404  
405  
406  
407  
408  
409  
410  
411  
412  
413  
414  
415  
416  
417  
418  
419  
420  
421  
422  
423  
424  
425  
426  
427  
428  
429  
430  
431  
432  
433  
434  
435  
436  
437  
438  
439  
440  
441  
442  
443  
444  
445  
446  
447  
448  
449  
450  
451  
452  
453  
454  
455  
456  
457  
458  
459  
460  
461  
462  
463  
464  
465  
466  
467  
468  
469  
470  
471  
472  
473  
474  
475  
476  
477  
478  
479  
480  
481  
482  
483  
484  
485  
486  
487  
488  
489  
490  
491  
492  
493  
494  
495  
496  
497  
498  
499  
500  
501  
502  
503  
504  
505  
506  
507  
508  
509  
510  
511  
512  
513  
514  
515  
516  
517  
518  
519  
520  
521  
522  
523  
524  
525  
526  
527  
528  
529  
530  
531  
532  
533  
534  
535  
536  
537  
538  
539  
540  
541  
542  
543  
544  
545  
546  
547  
548  
549  
550  
551  
552  
553  
554  
555  
556  
557  
558  
559  
560  
561  
562  
563  
564  
565  
566  
567  
568  
569  
570  
571  
572  
573  
574  
575  
576  
577  
578  
579  
580  
581  
582  
583  
584  
585  
586  
587  
588  
589  
590  
591  
592  
593  
594  
595  
596  
597  
598  
599  
600  
601  
602  
603  
604  
605  
606  
607  
608  
609  
610  
611  
612  
613  
614  
615  
616  
617  
618  
619  
620  
621  
622  
623  
624  
625  
626  
627  
628  
629  
630  
631  
632  
633  
634  
635  
636  
637  
638  
639  
640  
641  
642  
643  
644  
645  
646  
647  
648  
649  
650  
651  
652  
653  
654  
655  
656  
657  
658  
659  
660  
661  
662  
663  
664  
665  
666  
667  
668  
669  
670  
671  
672  
673  
674  
675  
676  
677  
678  
679  
680  
681  
682  
683  
684  
685  
686  
687  
688  
689  
690  
691  
692  
693  
694  
695  
696  
697  
698  
699  
700  
701  
702  
703  
704  
705  
706  
707  
708  
709  
710  
711  
712  
713  
714  
715  
716  
717  
718  
719  
720  
721  
722  
723  
724  
725  
726  
727  
728  
729  
730  
731  
732  
733  
734  
735  
736  
737  
738  
739  
740  
741  
742  
743  
744  
745  
746  
747  
748  
749  
750  
751  
752  
753  
754  
755  
756  
757  
758  
759  
760  
761  
762  
763  
764  
765  
766  
767  
768  
769  
770  
771  
772  
773  
774  
775  
776  
777  
778  
779  
780  
781  
782  
783  
784  
785  
786  
787  
788  
789  
790  
791  
792  
793  
794  
795  
796  
797  
798  
799  
800  
801  
802  
803  
804  
805  
806  
807  
808  
809  
810  
811  
812  
813  
814  
815  
816  
817  
818  
819  
820  
821  
822  
823  
824  
825  
826  
827  
828  
829  
830  
831  
832  
833  
834  
835  
836  
837  
838  
839  
840  
841  
842  
843  
844  
845  
846  
847  
848  
849  
850  
851  
852  
853  
854  
855  
856  
857  
858  
859  
860  
861  
862  
863  
864  
865  
866  
867  
868  
869  
870  
871  
872  
873  
874  
875  
876  
877  
878  
879  
880  
881  
882  
883  
884  
885  
886  
887  
888  
889  
890  
891  
892  
893  
894  
895  
896  
897  
898  
899  
900  
901  
902  
903  
904  
905  
906  
907  
908  
909  
910  
911  
912  
913  
914  
915  
916  
917  
918  
919  
920  
921  
922  
923  
924  
925  
926  
927  
928  
929  
930  
931  
932  
933  
934  
935  
936  
937  
938  
939  
940  
941  
942  
943  
944  
945  
946  
947  
948  
949  
950  
951  
952  
953  
954  
955  
956  
957  
958  
959  
960  
961  
962  
963  
964  
965  
966  
967  
968  
969  
970  
971  
972  
973  
974  
975  
976  
977  
978  
979  
980  
981  
982  
983  
984  
985  
986  
987  
988  
989  
990  
991  
992  
993  
994  
995  
996  
997  
998  
999  
1000

Limitations in ADL and iADL were investigated using questions from the “Survey of Aging and Retirement in Europe” (SHARE).[33] Participants were asked whether they had difficulties due to physical, emotional or cognitive problems to perform 15 activities like dressing, gardening, using a map or making a telephone call. Binary response options for each activity were yes or no. Subsequently, a sum score of limitations in ADL/iADL activities was calculated ranging from 0 to 15. Higher scores indicate more functional impairments.

The TUG is one of the most frequently used measures of balance and functional mobility in older adults and is a recommended tool for geriatric assessment.[34] During performance of the TUG, time (in seconds) is taken for rising up from a standardized chair, walking three metres, turning around, walking back and sitting down again in a comfortable self-selected

1  
2  
3 speed.[35] Higher TUG times are associated with stronger mobility and ADL restrictions.[36,  
4  
5 37]

6  
7 The EQ-VAS from the EQ-5D-5L version was used to record overall self-rated health  
8 of the day on a vertical visual analogue scale ranging from 0 points for the worst imaginable  
9 health to 100 points for the best conceivable health.[38] To measure balance confidence, we  
10 used the ABC-6-Scale that was translated into German and validated by Schott et al.[39]  
11  
12 Participants were accounted to have a history of falls if they had fallen at least one time in the  
13 past six months using the criteria's of the "Frailty and Injuries: Cooperative Studies of  
14 Intervention Techniques" to define a fall[40].  
15  
16

### 17 ***Secondary outcome measures of health***

18  
19 Hand grip strength was measured as maximum of three contractions with a hydraulic handheld  
20 dynamometer (Saehan SH5001; Changwon, South Korea) in the dominant hand and  
21 standardized sitting position.[41] We administered the Charlson comorbidity index (CCI) as a  
22 method to categorize comorbidities (0-41 points) where scores of >5 indicate a higher mortality  
23 risk.[42] Cognitive status was assessed with the Mini-Cog screening tool where a score ranging  
24 from 0-5 can be achieved and a score of 0-2 is seen as an indicator for further investigation of  
25 cognitive status.[43]  
26  
27  
28  
29  
30  
31  
32  
33  
34  
35  
36  
37  
38  
39  
40  
41  
42  
43  
44  
45

### 46 **Statistical analysis**

47 Means (M) and standard deviations (SD) were reported descriptively for continuous  
48 demographic variables (i.e., age, height, weight) and health measures (i.e., limitations in  
49 ADL/iADL, time in seconds needed to complete TUG, self-rated health and balance  
50 confidence). Gender, status of shared living arrangements, use of different transportation modes  
51 and history of falls were reported for the total and each subsample as absolute frequencies and  
52 percentage of participants. Distribution of the data was skewed therefore we used the non-  
53 parametric, bias corrected and accelerated (BCA) bootstrap method with 10,000 resamples and  
54  
55  
56  
57  
58  
59  
60

1  
2  
3 fixed random seeds that resamples the collected data with replacement to derive robust  
4 results.[44] With the BCA bootstrap method, coefficients and confidence intervals can be  
5  
6 estimated with good statistical power even if sample sizes are small and distribution of data is  
7  
8 unknown or not normal. For investigating differences between urban and rural participants, the  
9  
10 Welch Test was performed as it has been recommended as a standard test for small samples.[45]  
11  
12 To determine construct validity of the LSA-D, BCA bootstrap method and standardized z-  
13  
14 scores (i.e., that can be interpreted like beta coefficients) of the included binary and continuous  
15  
16 variables (i.e., age, male gender, rural or urban residence, status of shared living arrangements,  
17  
18 sum score of limitations with ADL/iADL activities, functional mobility with TUG, self-rated  
19  
20 health, balance confidence and history of falls) were used for bivariate and multivariate  
21  
22 regression analysis. Scores of the ABC-6 scale had to be excluded from multivariate regression  
23  
24 because they revealed a correlation of  $r=-.72$  with TUG scores. To avoid multicollinearity, it  
25  
26 was decided to include only the TUG score due to its importance as a physical measurement of  
27  
28 functional mobility for assessing construct validity. All analyses were run using SPSS version  
29  
30 25. Microsoft Excel 2016 was used to create the figure.  
31  
32  
33  
34  
35  
36  
37  
38  
39  
40  
41

## 42 Results

### 43 Sample characteristics

44  
45 For the total sample (N=83), mean age was 78.5 (SD=5.4) years and about half of the  
46  
47 sample (n=41; 49.4%) were male. 47 participants (56.6%) lived together with others in a shared  
48  
49 living arrangement. In the past four weeks, 39 participants (47.0%) drove a car by themselves,  
50  
51 18 participants (21.7%) rode a bicycle and 34 participants (41.0%) used walking aids. On  
52  
53 average, participants had a TUG of M=13.90 (SD=9.20) seconds. Score of limitations in  
54  
55 ADL/iADL was moderate with M=7.8 (SD=6.2) and mean score of self-rated health was  
56  
57 M=64.7 (SD=21.3).  
58  
59  
60

1  
2  
3 When comparing urban with rural participants, those living in urban areas had  
4 significantly more ADL/iADL limitations,  $t(74.51)=-2.34$ ;  $p=.022$ , and comorbidities,  
5  $t(57.27)=-2.44$ ;  $p=.018$ . Rural participants were significantly older,  $t(81)=2.43$ ;  $p=.017$ , needed  
6 more time to complete the TUG,  $t(70.65)=3.33$ ;  $p=.001$ , had less balance confidence,  $t(80.11)=-$   
7  $2.84$ ;  $p=.006$ , were more often assigned to a care level,  $t(69.62)=4.53$ ;  $p<.001$ , and had lower  
8 self-rated health,  $t(81)=-2.45$ ;  $p=.016$ . Concerning the utilization of means of transportation,  
9 the percentage of participants who drove a car or a bicycle for independent mobility within the  
10 last 4 weeks did not differ significantly across regions. Characteristics of participants in total  
11 and separately for each region are presented in table 1.  
12  
13  
14  
15  
16  
17  
18  
19  
20  
21  
22  
23  
24  
25  
26  
27  
28  
29  
30  
31  
32  
33  
34  
35  
36  
37  
38  
39  
40  
41  
42  
43  
44  
45  
46  
47  
48  
49  
50  
51  
52  
53  
54  
55  
56  
57  
58  
59  
60

Table 1: Participant Characteristics

| Variable                               | total (N=83) |           | urban (n=40) |           | rural (n=43) |           |
|----------------------------------------|--------------|-----------|--------------|-----------|--------------|-----------|
|                                        | <i>N</i>     | %         | <i>N</i>     | %         | <i>N</i>     | %         |
| Gender (male)                          | 41           | 49.4      | 23           | 57.5      | 18           | 41.9      |
| Status of shared living arrangements   | 47           | 56.6      | 19           | 47.5      | 28           | 65.1      |
| Drove a car in past 4 weeks            | 39           | 47.0      | 18           | 45.0      | 21           | 48.8      |
| Rode a bicycle in past 4 weeks         | 18           | 21.7      | 9            | 22.5      | 9            | 20.9      |
| Used walking aid in past 4 weeks       | 34           | 41.0      | 11           | 27.5      | 23           | 53.5      |
| History of falls past 6 months (>1)    | 22           | 26.5      | 9            | 22.5      | 13           | 30.2      |
|                                        | <i>M</i>     | <i>SD</i> | <i>M</i>     | <i>SD</i> | <i>M</i>     | <i>SD</i> |
| Age (years)                            | 78.5         | 5.4       | 77.1         | 5.2       | 79.8         | 5.2       |
| Height (cm)                            | 168.7 (3)    | 10.5      | 170.8        | 11.2      | 166.5 (3)    | 9.3       |
| Weight (kg)                            | 79.0 (3)     | 18.8      | 79.7         | 19.8      | 78.3 (3)     | 17.8      |
| Body Mass Index                        | 27.6 (3)     | 5.4       | 27.1         | 5.8       | 28.1 (3)     | 5.1       |
| Charlson Comorbidity Index (0-41)      | 3.2          | 3.6       | 4.2          | 4.5       | 2.3          | 2.3       |
| Hand grip strength (kg)                | 25.8 (2)     | 11.6      | 27.7 (1)     | 11.8      | 24.0 (1)     | 11.4      |
| Mini-Cog™-Score (0-5)                  | 3.8          | 1.5       | 3.8          | 1.6       | 3.8          | 1.4       |
| LSA-D composite score (0-120)          | 60.8         | 24.3      | 58.0         | 21.7      | 63.3         | 26.5      |
| ADL/iADL (number of limitations; 0-15) | 7.8          | 6.2       | 9.4          | 6.7       | 6.2          | 5.4       |
| TUG (s)                                | 13.9 (5)     | 9.2       | 10.5 (3)     | 6.8       | 16.9 (2)     | 10.1      |
| Self-rated health (0-100)              | 64.8         | 21.3      | 70.5         | 19.3      | 59.4         | 21.8      |
| Balance confidence (0-100)             | 57.8         | 32.7      | 67.8         | 28.4      | 48.4         | 34.0      |

Note: Live-Space-Assessment-Deutsch (LSA-D); Activities of Daily Living (ADL); Instrumented Activities of Daily Living (iADL); Timed-Up &Go-Test (TUG); Numbers in brackets report number of missing values



## Descriptive statistics of the LSA-D

Life-space-level 5, as maximum life-space (LS-M), was reached by 60.2% of the total sample. 32.5% of all participants had an independent life-space level (LS-I) of 5 while the remaining needed either equipment or personal help. For the urban subsample, 40.0% of the participants reached life-space level 5 as LS-M and 27.5% of urban participants reached life-space level 5 independently without any support (LS-I). In contrast, 79.1% of rural participants achieved LS-level 5 as LS-M and 37.2% did this independently without any support (LS-I). Figure 1 illustrates the different life-space measures among the total sample and urban/rural subsample. No significant differences between urban and rural participants were observed in LS-C: ( $t(81)=1.00$ ;  $p=.323$ ), LS-E: ( $t(81)=0.57$ ;  $p=.571$ ), and LS-D: ( $t(80.99)=-1.95$ ;  $p=.054$ ). Rural participants had a significantly higher LS-M: ( $t(64.60)=3.83$ ;  $p<.001$ ), and LS-I: ( $t(77)=-2.00$ ;  $p=.049$ ).

## Construct validity

For the total sample, associations from the bivariate regression analyses between the LSA-D composite score, demographic variables, functional mobility and other health measures were significant for age ( $\beta=-.24$ ; 95%CI $=-.44/-.07$ ;  $p=.016$ ), status of shared living arrangements ( $\beta=.22$ ; 95%CI $=.01/.43$ ;  $p=.040$ ) ADL/iADL ( $\beta=-.23$ ; 95%CI $=-.43/-.01$ ;  $p=.034$ ), TUG ( $\beta=-.47$ ; 95%CI $=-.66/-.34$ ;  $p<.001$ ), self-rated health ( $\beta=.40$ ; 95%CI $=.19/.61$ ;  $p<.001$ ), history of falls ( $\beta=-.35$ ; 95%CI $=-.54/-.15$ ;  $p<.001$ ). Male gender ( $\beta=-.09$ ; 95%CI $=-.31/.13$ ;  $p=.407$ ) and urban residence ( $\beta=-.11$ ; 95%CI $=-.33/.10$ ;  $p=.314$ ) were not significant for the total sample. In the adjusted model, age, male gender, urban residence, status of shared living arrangements, number of limitations in ADL/iADL, TUG, self-rated health and history of falls were included into the equation in one step for the total sample. The result revealed significant associations for living status in shared living arrangements ( $\beta=.22$ ; 95%CI $=.01/.44$ ;  $p=.045$ ), limitations in ADL/iADL activities ( $\beta=-.26$ ; 95%CI $=-.42/-.08$ ;  $p=.008$ ), functional mobility

measured with the TUG ( $\beta=-.37$ ; 95%CI $=-.68/-14$ ;  $p=.008$ ) and history of falls ( $\beta=-.22$ ; 95%CI $=-.41/-05$ ;  $p=.018$ ). No significant associations were found for male gender ( $\beta=.15$ ; 95%CI $=-.04/.35$ ;  $p=.135$ ) and urban residence ( $\beta=-.19$ ; 95%CI $=-.42/.03$ ;  $p=.090$ ), which corresponds with the bivariate model. However, in contrast to bivariate models, influence of age ( $\beta=-.08$ ; 95%CI $=-.32/.12$ ;  $p=.509$ ) and self-rated health ( $\beta=.24$ ; 95%CI $=.02/.47$ ,  $p=.058$ ) were not significant in the multivariate model. Results of bivariate and adjusted multivariate regression models are shown in table 2.

Table 2: Unadjusted and adjusted associations of sociodemographic and health factors with the LSA-D composite score (N=83)

| Variable                             | <i>Bivariate unadjusted models</i> |                      |                  | <i>Adjusted model</i> |                      |             |
|--------------------------------------|------------------------------------|----------------------|------------------|-----------------------|----------------------|-------------|
|                                      | <i>Beta</i>                        | <i>LL CI / UL CI</i> | <i>p</i>         | <i>Beta</i>           | <i>LL CI / UL CI</i> | <i>p</i>    |
| Age                                  | <b>-.24</b>                        | <b>-.44/-07</b>      | <b>.016</b>      | -.08                  | -.32/.12             | .509        |
| Gender (male)                        | -.09                               | -.31/.13             | .407             | .15                   | -.04/.35             | .135        |
| Living in shared living arrangements | <b>.22</b>                         | <b>.01/.43</b>       | <b>.040</b>      | <b>.22</b>            | <b>.01/.44</b>       | <b>.045</b> |
| Lives in urban area                  | -.11                               | -.33/.10             | .314             | -.19                  | -.42/.03             | .090        |
| ADL/iADL-Score                       | <b>-.23</b>                        | <b>-.43/-01</b>      | <b>.034</b>      | <b>-.26</b>           | <b>-.42/-08</b>      | <b>.008</b> |
| TUG                                  | <b>-.47</b>                        | <b>-.66/-34</b>      | <b>&lt; .001</b> | <b>-.37</b>           | <b>-.68/-14</b>      | <b>.008</b> |
| Self-rated health                    | <b>.40</b>                         | <b>.19/.61</b>       | <b>&lt; .001</b> | .24                   | .02/.47              | .058        |
| Balance confidence                   | <b>.50</b>                         | <b>.33/.67</b>       | <b>&lt; .001</b> | -                     | -                    | -           |
| History of falls in past 6 months    | <b>-.35</b>                        | <b>-.54/-15</b>      | <b>&lt; .001</b> | <b>-.22</b>           | <b>-.41/-05</b>      | <b>.018</b> |

Notes: Timed-Up&Go-Test (TUG); Activities of Daily Living (ADL); Instrumental Activities of Daily Living (iADL);  $p < .05$  highlighted in bold

1  
2  
3 Separate bivariate regression analyses for the urban and rural region demonstrated comparable  
4  
5 results in the urban and rural subsample for TUG urban: ( $\beta=-.48$ ; 95%CI=-1.14/-.32;  $p=.008$ )  
6  
7 and rural: ( $\beta=-.60$ ; 95%CI=-.95/-.40;  $p<.001$ ), self-rated health urban: ( $\beta=.51$ ; 95%CI=.29/.90;  
8  
9  $p=.001$ ) and rural: ( $\beta=.43$ ; 95%CI=.12/.77;  $p=.010$ ), balance confidence urban: ( $\beta=.67$ ;  
10  
11 95%CI=.38/.93;  $p=<.001$ ) and rural: ( $\beta=.54$ ; 95%CI=.29/.81;  $p=.001$ ) and history of falls urban:  
12  
13 ( $\beta=-.31$ ; 95%CI=-.59/-.03;  $p=.030$ ) and rural: ( $\beta=-.41$ ; 95%CI=-.67/-.11;  $p=.009$ ). Age was  
14  
15 significant for those living in the urban region ( $\beta=-.31$ ; 95%CL=-.53/-.09;  $p=.011$ ), but not for  
16  
17 the rural sample ( $\beta=-.28$ ; 95%CI=-.68/.03;  $p=.147$ ). All other demographic variables and health  
18  
19 measures showed no significant associations in both groups. Results are presented in table 3.  
20  
21  
22  
23  
24  
25

26 Post-hoc calculations of the adjusted model for each sample separately showed a significant  
27  
28 regression coefficient in the urban sample for the score of ADL/iADL limitations ( $\beta=-.23$ ;  
29  
30 95%CI=-.41/-.10;  $p=.035$ ) while coefficients for all other variables were not significant. For the  
31  
32 rural population, results for status of shared living arrangements ( $\beta=.39$ ; 95%CI=.02/.75;  
33  
34  $p=.039$ ) and history of falls ( $\beta=-.42$ ; 95%CI=-.80/-.08;  $p=.04$ ) showed significance while other  
35  
36 variables did not.  
37  
38  
39  
40  
41  
42  
43  
44  
45  
46  
47  
48  
49  
50  
51  
52  
53  
54  
55  
56  
57  
58  
59  
60

Table 3: Unadjusted associations of sociodemographic and health factors with LSA-D composite score for participants in urban (n=40) and rural areas (n=43)

| Variable                             | Urban       |                      |                  | Rural       |                      |                  |
|--------------------------------------|-------------|----------------------|------------------|-------------|----------------------|------------------|
|                                      | <i>Beta</i> | <i>LL CI / UL CI</i> | <i>p</i>         | <i>Beta</i> | <i>LL CI / UL CI</i> | <i>P</i>         |
| Age                                  | <b>-.31</b> | <b>-.53/-.09</b>     | <b>.011</b>      | -.28        | -.68/.03             | .147             |
| Gender (male)                        | -.20        | -.43/.06             | .151             | -.04        | -.38/.29             | .826             |
| Living in shared living arrangements | .18         | -.11/.45             | .231             | .24         | -.10/.54             | .150             |
| ADL/iADL-Score                       | -.16        | -.39/.11             | .209             | -.28        | -.71/.11             | .208             |
| TUG                                  | <b>-.48</b> | <b>-1.14/-.32</b>    | <b>.008</b>      | <b>-.60</b> | <b>-.95/-.40</b>     | <b>&lt; .001</b> |
| Self-rated health                    | <b>.51</b>  | <b>.29/.90</b>       | <b>.001</b>      | <b>.43</b>  | <b>.12/.77</b>       | <b>.010</b>      |
| Balance confidence                   | <b>.67</b>  | <b>.38/.93</b>       | <b>&lt; .001</b> | <b>.54</b>  | <b>.29/.81</b>       | <b>.001</b>      |
| History of falls in past 6 month     | <b>-.31</b> | <b>-.59/-.03</b>     | <b>.030</b>      | <b>-.41</b> | <b>-.67/-.11</b>     | <b>.009</b>      |

Notes: Timed-Up&Go-Test (TUG); Activities of Daily Living (ADL); Instrumental Activities of Daily Living (iADL); p < .05 highlighted in bold

## Discussion

We translated and validated a German version of the LSA in urban and rural community-dwelling older adults. In line with the original validation of the LSA[12], moderate associations of the LSA-D composite score with status of living in shared living arrangements, limitations in ADL/iADL as well as with physical performance assessed with the TUG and history of falls were found in the standardized adjusted model. The standardized adjusted association of limitations in ADL/iADL with the LSA-D composite score revealed in our study is in line with findings of Baker et al.[12] and Curcio[22], albeit lower than expected. We found stronger moderate adjusted associations for functional mobility measured with the TUG. These results correspond with findings by Ullrich et al. who reported a moderate Pearson correlation with the TUG when validating the modified LSA-CI to capture life-space of older adults with mild cognitive impairment during the past week.[46] Previous validation studies have tested their version of the LSA composite score against against the Short Physical Performance Battery as a physical assessment of functional mobility and found moderate to strong association.[12, 26] Furthermore, our results revealed a moderate significant association for self-rated health with the LSA-D composite score in bivariate regression, which is in accordance with the original LSA validation study.[12] However, this association did not remain significant in the adjusted model. Unfortunately, balance confidence as an additional subjective health measure that showed moderate significant bivariate associations could not be included in the adjusted model due to multicollinearity.

Our adjusted model confirms the importance of social resources as they can be seen in living together with others in shared living arrangements and functional mobility represented by the significant negative associations with limitations in ADL/iADL activities, time to complete the TUG and a positive history of falls. The importance of social resources was strengthened in post-hoc analyses, where we calculated the adjusted model for each regional

1  
2  
3 subsample separately. Results showed that living in shared living arrangements and history of  
4 falls were significantly associated with life-space mobility in rural areas. This indicates that a  
5 nearby social network may play an even more important role in rural areas. In this regard,  
6 Kusipar et al.[5] also found evidence for the importance of social support on LS-mobility in the  
7 Canadian Longitudinal Study of Aging. Taken together, our findings demonstrate robust  
8 evidence for a good construct validity of the LSA-D.  
9

10  
11 To test our hypothesis that the LSA-D is applicable in both urban and rural living  
12 environments, we calculated separate bivariate regressions for each subsample. The  
13 associations were similarly strong for functional mobility, self-rated health, balance confidence  
14 and history of falls. Although a significant association with age was only found for the urban  
15 population and limitations in ADL/iADL were not significant in either subsample, our findings  
16 generally correspond across both subsamples. This supports our notion that the LSA-D can be  
17 used for measurement of life-space mobility during the past four weeks in community dwelling  
18 older adults living in both urban and rural areas.  
19

20  
21 To further determine construct validity of the LSA-D, we investigated the different  
22 scoring methods in the total and both subsamples separately. The LS-M differed between urban  
23 and rural participants, with those from rural areas reporting higher LS-M than those living in  
24 urban surroundings. Older adults living in rural areas might be more dependent on leaving their  
25 village or town in order to gain access to health care services or to run routine errands due to  
26 the limited infrastructure often found in rural areas. Our results suggest that the LSA-D is a  
27 useful tool for capturing specific characteristics of urban and rural living environments. No  
28 group differences were found concerning the LSA-D composite score and the LS-D scoring  
29 method. This demonstrates the ability of the LSA-D composite score and the dichotomized LS-  
30 D score to remain stable and applicable outcome measures in urban and rural living  
31 environments.  
32  
33  
34  
35  
36  
37  
38  
39  
40  
41  
42  
43  
44  
45  
46  
47  
48  
49  
50  
51  
52  
53  
54  
55  
56  
57  
58  
59  
60

## Strengths and limitations

A main strength of our study is that we tested psychometric properties of the LSA-D among urban and rural community-dwelling older adults. As mobility patterns may vary across living areas, assessments of mobility need to be valid for people living in small villages and large cities as well. Our findings revealed an urban-rural difference in maximal LS and thus demonstrate that the LSA-D can detect disparities in individual mobility patterns that are related to the surrounding living area. These differences must be considered when health care practitioners or researchers address specific questions about independence, social support and functional mobility in different regions. Maximal LS measured with the LS-M score is likely to vary between urban and rural areas and thus may reflect availability of different environmental resources and social support. Another strength is that we applied advanced statistical methods including non-parametric bootstrapping procedures and multivariate regression analysis to account for confounding variables and to estimate the independent association of each of the variables with LSA-D composite-score. However, there are some limitations that need to be considered. First, due to the beginning of the Covid-19 pandemic, we did not reach the planned sample size. However, post-hoc sensitivity analyses revealed a sufficient statistical power. Second, although statistical power was sufficient and the focus was on community-dwelling older adults, our sample size was rather small and non-representative. Future studies should replicate our findings in a representative sample, including subgroups of older adults with mild cognitive impairment, care dependency or living in nursing care arrangements. Moreover, future studies should consider the overlap between LS scoring methods of the LSA-D, social constructs and objectively derived GPS data. This multimodal approach can lead to a better understanding of complex mobility patterns in older adults and associated factors.

## Conclusion

In conclusion, the LSA-D has shown good construct validity and can be used in the general population of community-dwelling older adults in urban and rural living environments. The use of LSA-D is recommended for geriatric health care practitioners of different disciplines to assess mobility in the context of social participation and health service utilization.

## Acknowledgments

We sincerely thank Patricia Sawyer for her feedback on the pre-final, back translated English LSA-D version. Also, we would like to thank Monica Schanzer and Rudolf Mörgeli for the back translation of the LSA-D, all participants and all members of the study staff that are not listed as authors.



## References

- 1 Webber SC, Porter MM, Menec VH. Mobility in older adults: a comprehensive framework. *Gerontologist* 2010;**50**:443-50.
- 2 Rantakokko M, Wilkie R. The role of environmental factors for the onset of restricted mobility outside the home among older adults with osteoarthritis: a prospective cohort study. *BMJ Open* 2017;**7**:e012826.
- 3 Spaltenstein J, Bula C, Santos-Eggimann B, et al. Factors associated with going outdoors frequently: a cross-sectional study among Swiss community-dwelling older adults. *BMJ Open* 2020;**10**:e034248.
- 4 Giannouli E, Bock O, Mellone S, et al. Mobility in Old Age: Capacity Is Not Performance. *Biomed Res Int* 2016;**2016**:3261567-.
- 5 Kuspinar A, Verschoor CP, Beauchamp MK, et al. Modifiable factors related to life-space mobility in community-dwelling older adults: results from the Canadian Longitudinal Study on Aging. *BMC Geriatr* 2020;**20**:35.
- 6 Portegijs E, Keskinen KE, Tsai L-T, et al. Physical Limitations, Walkability, Perceived Environmental Facilitators and Physical Activity of Older Adults in Finland. *International Journal of Environmental Research and Public Health* 2017;**14**:333.
- 7 May D, Nayak US, Isaacs B. The life-space diary: a measure of mobility in old people at home. *International rehabilitation medicine* 1985;**7**:182-6.
- 8 Taylor JK, Buchan IE, van der Veer SN. Assessing life-space mobility for a more holistic view on wellbeing in geriatric research and clinical practice. *Aging clinical and experimental research* 2019;**31**:439-45.

- 1  
2  
3 9 Hashidate H, Shimada H, Shiomi T, et al. Measuring indoor life-space mobility at home  
4  
5 in older adults with difficulty to perform outdoor activities. *J Geriatr Phys Ther* 2013;**36**:109-  
6  
7 14.  
8  
9  
10 10 Tinetti ME, Ginter SF. The nursing home life-space diameter. A measure of extent and  
11  
12 frequency of mobility among nursing home residents. *Journal of the American Geriatrics*  
13  
14 *Society* 1990;**38**:1311-5.  
15  
16  
17 11 Hauer K, Ullrich P, Heldmann P, et al. Validation of the interview-based life-space  
18  
19 assessment in institutionalized settings (LSA-IS) for older persons with and without cognitive  
20  
21 impairment. *BMC Geriatrics* 2020;**20**:534.  
22  
23  
24 12 Baker PS, Bodner EV, Allman RM. Measuring life-space mobility in community-dwelling  
25  
26 older adults. *Journal of the American Geriatrics Society* 2003;**51**:1610-4.  
27  
28  
29 13 Kennedy RE, Sawyer P, Williams CP, et al. Life-Space Mobility Change Predicts 6-Month  
30  
31 Mortality. *Journal of the American Geriatrics Society* 2017;**65**:833-8.  
32  
33  
34 14 Mackey DC, Cauley JA, Barrett-Connor E, et al. Life-space mobility and mortality in  
35  
36 older men: a prospective cohort study. *Journal of the American Geriatrics Society*  
37  
38 2014;**62**:1288-96.  
39  
40  
41 15 Silberschmidt S, Kumar A, Raji MM, et al. Life-Space Mobility and Cognitive Decline  
42  
43 Among Mexican Americans Aged 75 Years and Older. *Journal of the American Geriatrics*  
44  
45 *Society* 2017;**65**:1514-20.  
46  
47  
48 16 Lo AX, Rundle AG, Buys D, et al. Neighborhood Disadvantage and Life-Space Mobility  
49  
50 Are Associated with Incident Falls in Community-Dwelling Older Adults. *Journal of the*  
51  
52 *American Geriatrics Society* 2016;**64**:2218-25.  
53  
54  
55  
56  
57  
58  
59  
60

- 1  
2  
3 17 Portegijs E, Rantakokko M, Viljanen A, et al. Is frailty associated with life-space mobility  
4 and perceived autonomy in participation outdoors? A longitudinal study. *Age Ageing*  
5 2016;**45**:550-3.  
6  
7  
8  
9  
10 18 Lo AX, Flood KL, Kennedy RE, et al. The Association Between Life-Space and Health Care  
11 Utilization in Older Adults with Heart Failure. *J Gerontol A Biol Sci Med Sci* 2015;**70**:1442-7.  
12  
13  
14  
15 19 McCrone A, Smith A, Hooper J, et al. The Life-Space Assessment Measure of Functional  
16 Mobility Has Utility in Community-Based Physical Therapist Practice in the United Kingdom.  
17 *Physical Therapy* 2019;**99**:1719-31.  
18  
19  
20  
21 20 Sartori AC, Wadley VG, Clay OJ, et al. The relationship between cognitive function and  
22 life space: the potential role of personal control beliefs. *Psychology and aging* 2012;**27**:364-  
23 74.  
24  
25  
26  
27  
28  
29  
30 21 Saajanaho M, Rantakokko M, Portegijs E, et al. Personal goals and changes in life-space  
31 mobility among older people. *Preventive medicine* 2015;**81**:163-7.  
32  
33  
34  
35 22 Curcio CL, Alvarado BE, Gomez F, et al. Life-Space Assessment scale to assess mobility:  
36 validation in Latin American older women and men. *Aging clinical and experimental research*  
37 2013;**25**:553-60.  
38  
39  
40  
41  
42 23 Ullrich P, Werner C, Bongartz M, et al. Validation of a Modified Life-Space Assessment  
43 in Multimorbid Older Persons With Cognitive Impairment. *Gerontologist* 2019;**59**:e66-e75.  
44  
45  
46  
47 24 Auger C, Demers L, Gelinat I, et al. Development of a French-Canadian version of the  
48 Life-Space Assessment (LSA-F): content validity, reliability and applicability for power mobility  
49 device users. *Disabil Rehabil Assist Technol* 2009;**4**:31-41.  
50  
51  
52  
53  
54 25 Tseng YC, Gau BS, Lou MF. Validation of the Chinese version of the Life-Space  
55 Assessment in community-dwelling older adults. *Geriatr Nurs* 2020;**41**:381-6.  
56  
57  
58  
59  
60

1  
2  
3 26 Fristedt S, Kammerlind AS, Bravell ME, et al. Concurrent validity of the Swedish version  
4  
5 of the life-space assessment questionnaire. *BMC Geriatr* 2016;**16**:181.  
6

7  
8 27 Pedersen MM, Kjaer-Sorensen P, Midtgaard J, et al. A Danish version of the life-space  
9  
10 assessment (LSA-DK) - translation, content validity and cultural adaptation using cognitive  
11  
12 interviewing in older mobility limited adults. *BMC Geriatr* 2019;**19**:312.  
13

14  
15 28 Faul F, Erdfelder E, Buchner A, et al. Statistical power analyses using G\*Power 3.1: tests  
16  
17 for correlation and regression analyses. *Behavior research methods* 2009;**41**:1149-60.  
18

19  
20 29 WHO. Process of translation and adaption of instruments.  
21  
22 [https://www.who.int/substance\\_abuse/research\\_tools/translation/en/](https://www.who.int/substance_abuse/research_tools/translation/en/) 2008.  
23

24  
25 30 Forsyth BHK, Martha Stapelton; Lawrence, Deidre; Levine, Kerry; Willis Gorgon B.  
26  
27 Methods for Translating Survey Questionnaires. *American Association for Public Opinion*  
28  
29 *Research* 2006.  
30

31  
32 31 Ritchie CS, Locher JL, Roth DL, et al. Unintentional weight loss predicts decline in  
33  
34 activities of daily living function and life-space mobility over 4 years among community-  
35  
36 dwelling older adults. *J Gerontol A Biol Sci Med Sci* 2008;**63**:67-75.  
37

38  
39 32 Sheppard KD, Sawyer P, Ritchie CS, et al. Life-space mobility predicts nursing home  
40  
41 admission over 6 years. *Journal of aging and health* 2013;**25**:907-20.  
42

43  
44 33 Borsch-Supan A, Brandt M, Hunkler C, et al. Data Resource Profile: the Survey of  
45  
46 Health, Ageing and Retirement in Europe (SHARE). *Int J Epidemiol* 2013;**42**:992-1001.  
47

48  
49 34 Turner G, Clegg A. Best practice guidelines for the management of frailty: a British  
50  
51 Geriatrics Society, Age UK and Royal College of General Practitioners report. *Age and Ageing*  
52  
53 2014;**43**:744-7.  
54

55  
56 35 Podsiadlo D, Richardson S. The timed "Up & Go": a test of basic functional mobility for  
57  
58 frail elderly persons. *Journal of the American Geriatrics Society* 1991;**39**:142-8.  
59  
60

1  
2  
3 36 Lin MR, Hwang HF, Hu MH, et al. Psychometric comparisons of the timed up and go,  
4  
5 one-leg stand, functional reach, and Tinetti balance measures in community-dwelling older  
6  
7 people. *Journal of the American Geriatrics Society* 2004;**52**:1343-8.

8  
9  
10 37 Donoghue OA, Savva GM, Cronin H, et al. Using timed up and go and usual gait speed  
11  
12 to predict incident disability in daily activities among community-dwelling adults aged 65 and  
13  
14 older. *Archives of physical medicine and rehabilitation* 2014;**95**:1954-61.

15  
16 38 Ludwig K, Graf von der Schulenburg JM, Greiner W. German Value Set for the EQ-5D-  
17  
18 5L. *Pharmacoeconomics* 2018;**36**:663-74.

19  
20 39 Schott N. Reliability and validity of the German short version of the Activities specific  
21  
22 Balance Confidence (ABC-D6) scale in older adults. *Archives of gerontology and geriatrics*  
23  
24 2014;**59**:272-9.

25  
26 40 Buchner DM, Hornbrook MC, Kutner NG, et al. Development of the common data base  
27  
28 for the FICSIT trials. *Journal of the American Geriatrics Society* 1993;**41**:297-308.

29  
30 41 Sousa-Santos AR, Amaral TF. Differences in handgrip strength protocols to identify  
31  
32 sarcopenia and frailty - a systematic review. *BMC Geriatr* 2017;**17**:238.

33  
34 42 Charlson ME, Pompei P, Ales KL, et al. A new method of classifying prognostic  
35  
36 comorbidity in longitudinal studies: development and validation. *Journal of chronic diseases*  
37  
38 1987;**40**:373-83.

39  
40 43 Borson S, Scanlan J, Brush M, et al. The mini-cog: a cognitive 'vital signs' measure for  
41  
42 dementia screening in multi-lingual elderly. *International journal of geriatric psychiatry*  
43  
44 2000;**15**:1021-7.

45  
46 44 Hesterberg TMDSM, S. ; Clipson, A. ; Epstein, R. Bootstrap methods and permutation  
47  
48 tests. In: A. MDSMGPCB, ed. *Intoduction to practice of statistics*. New York: Palgrave  
49  
50 Macmillan 2007.

1  
2  
3 45 Rasch D, Kubinger KD, Moder K. The two-sample t test: pre-testing its assumptions  
4  
5 does not pay off. *Statistical Papers* 2011;**52**:219-31.  
6  
7

8 46 Ullrich P, Eckert T, Bongartz M, et al. Life-space mobility in older persons with cognitive  
9  
10 impairment after discharge from geriatric rehabilitation. *Archives of gerontology and*  
11  
12 *geriatrics* 2019;**81**:192-200.  
13  
14  
15  
16  
17  
18  
19  
20  
21  
22  
23  
24  
25  
26  
27  
28  
29  
30  
31  
32  
33  
34  
35  
36  
37  
38  
39  
40  
41  
42  
43  
44  
45  
46  
47  
48  
49  
50  
51  
52  
53  
54  
55  
56  
57  
58  
59  
60

For peer review only

## Footnotes

**Contributors:** JK developed the first draft of the study. JK, SAM and PG planned and conducted the final study protocol. JK and SAM translated LSA into German, compiled the final version of the LSA-D, and contributed in recruiting and testing participants. SAM drafted the manuscript and conducted the major analyses. MS drafted tables and the figure. PG established the statistical analysis plan and performed the sample size and power calculation. MS assisted with data analyses and interpretation of the results. JLOS gave advice and commented on the manuscript. All authors critically reviewed the manuscript and approved the final version.

**Funding:** The study was partly financed by the “MOBILE”-Project funded by the Federal Ministry of Education and Research (BMBF; ID 01GY1803) and the Institute of Medical Sociology and Rehabilitation Science, Charité – Universitätsmedizin Berlin. We acknowledge support from the German Research Foundation (DFG) and the Open Access Publication Fund of Charité – Universitätsmedizin Berlin.

**Competing Interests:** Non declared.

**Patient consent for publication:** Not required

**Patient and public involvement:** Patients and/or the public were not involved in the design, or conduct, or reporting, or dissemination plans of this research.

**Ethical approval:** Ethics approval for the study was provided by the Ethics Committee of Charité – Universitätsmedizin Berlin (Rec. Reference EA2/124/19).

**Data availability statement:** Data will be made available on reasonable, methodologically sound request as soon as possible to achieve the aims of the approved proposal.

Available data includes individual participant data that underlies the results reported in this article after its deidentification, data dictionary and the analytical code.

Data will be available at least 3 months after, and ending 5 years following article publication.

Proposals should be directed at [sandra.muemken@charite.de](mailto:sandra.muemken@charite.de) or [joern.kiselev@charite.de](mailto:joern.kiselev@charite.de)

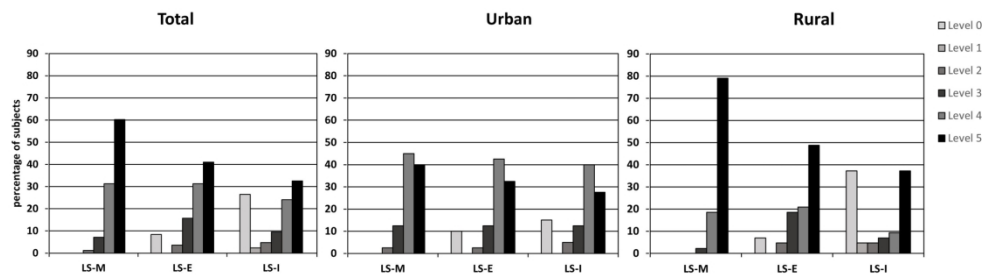

Distribution of different life-space levels of the LSA-D among the total sample, urban and rural subsample.  
 LS-M = maximal life-space; LS-E = life-space with equipment; LS-I = independent life-space; LS-C composite life-space

209x69mm (300 x 300 DPI)



## German Life-Space-Assessment LSA-D

| DIE NÄCHSTEN FRAGEN BEZIEHEN SICH AUF IHRE AKTIVITÄTEN IN DEN LETZTEN VIER WOCHEN:                                                                          |  |  | A. WIE HÄUFIG WAREN SIE IN DEN LETZTEN 4 WOCHEN IN (Name des Life-Space-Levels)?<br>Häufigkeit |                          |                             |                          | WIE SIND SIE DORT HINGEKOMMEN?                      |                          |                          |                                                         |                          |                          |                              |                          |  |
|-------------------------------------------------------------------------------------------------------------------------------------------------------------|--|--|------------------------------------------------------------------------------------------------|--------------------------|-----------------------------|--------------------------|-----------------------------------------------------|--------------------------|--------------------------|---------------------------------------------------------|--------------------------|--------------------------|------------------------------|--------------------------|--|
|                                                                                                                                                             |  |  |                                                                                                |                          |                             |                          | B. HABEN SIE HILFSMITTEL ODER AUSRÜSTUNG VERWENDET? |                          |                          | C. BENÖTIGTEN SIE DAFÜR DIE HILFE EINER ANDEREN PERSON? |                          |                          |                              |                          |  |
| WAREN SIE IN DEN LETZTEN 4 WOCHEN...                                                                                                                        |  |  | Ja                                                                                             | Nein                     | Weniger als 1 mal die Woche | 1-3 mal die Woche        | 4-6 mal die Woche                                   | Täglich                  | Ja                       | Nein                                                    | Unbekannt / keine Angabe | Ja                       | Nein                         | Unbekannt / keine Angabe |  |
| IN ANDEREN RÄUMEN IHRES ZUHAUSES außer dem Raum, in dem Sie schlafen?<br><i>LIFE-SPACE 1</i>                                                                |  |  | <b>LS1</b>                                                                                     | <input type="checkbox"/> | <input type="checkbox"/>    | <b>LS1-Häufigkeit</b>    |                                                     |                          |                          | <b>LS1-Hilfsmittel</b>                                  |                          |                          | <b>LS1-Persönliche Hilfe</b> |                          |  |
|                                                                                                                                                             |  |  | <input type="checkbox"/>                                                                       | <input type="checkbox"/> | <input type="checkbox"/>    | <input type="checkbox"/> | <input type="checkbox"/>                            | <input type="checkbox"/> | <input type="checkbox"/> | <input type="checkbox"/>                                | <input type="checkbox"/> | <input type="checkbox"/> | <input type="checkbox"/>     | <input type="checkbox"/> |  |
| IN DER NÄHEREN UMGEBUNG AUSSERHALB IHRER WOHNUNG (Hausflur, Terrasse, Balkon, Fahrstuhl, Hof, Garage, hauseigener Garten, Auffahrt)?<br><i>LIFE-SPACE 2</i> |  |  | <b>LS2</b>                                                                                     | <input type="checkbox"/> | <input type="checkbox"/>    | <b>LS2-Häufigkeit</b>    |                                                     |                          |                          | <b>LS2-Hilfsmittel</b>                                  |                          |                          | <b>LS2-Persönliche Hilfe</b> |                          |  |
|                                                                                                                                                             |  |  | <input type="checkbox"/>                                                                       | <input type="checkbox"/> | <input type="checkbox"/>    | <input type="checkbox"/> | <input type="checkbox"/>                            | <input type="checkbox"/> | <input type="checkbox"/> | <input type="checkbox"/>                                | <input type="checkbox"/> | <input type="checkbox"/> | <input type="checkbox"/>     | <input type="checkbox"/> |  |
| AN ORTEN IN IHRER NACHBARSCHAFT, aber außerhalb Ihrer Wohnung oder Ihrer näheren Wohnumgebung?<br><i>LIFE-SPACE 3</i>                                       |  |  | <b>LS3</b>                                                                                     | <input type="checkbox"/> | <input type="checkbox"/>    | <b>LS3-Häufigkeit</b>    |                                                     |                          |                          | <b>LS3-Hilfsmittel</b>                                  |                          |                          | <b>LS3-Persönliche Hilfe</b> |                          |  |
|                                                                                                                                                             |  |  | <input type="checkbox"/>                                                                       | <input type="checkbox"/> | <input type="checkbox"/>    | <input type="checkbox"/> | <input type="checkbox"/>                            | <input type="checkbox"/> | <input type="checkbox"/> | <input type="checkbox"/>                                | <input type="checkbox"/> | <input type="checkbox"/> | <input type="checkbox"/>     | <input type="checkbox"/> |  |
| AN ORTEN AUSSERHALB IHRER NACHBARSCHAFT, aber innerhalb der Stadt oder der Ortschaft, in der Sie leben?<br><i>LIFE-SPACE 4</i>                              |  |  | <b>LS4</b>                                                                                     | <input type="checkbox"/> | <input type="checkbox"/>    | <b>LS4-Häufigkeit</b>    |                                                     |                          |                          | <b>LS4-Hilfsmittel</b>                                  |                          |                          | <b>LS4-Persönliche Hilfe</b> |                          |  |
|                                                                                                                                                             |  |  | <input type="checkbox"/>                                                                       | <input type="checkbox"/> | <input type="checkbox"/>    | <input type="checkbox"/> | <input type="checkbox"/>                            | <input type="checkbox"/> | <input type="checkbox"/> | <input type="checkbox"/>                                | <input type="checkbox"/> | <input type="checkbox"/> | <input type="checkbox"/>     | <input type="checkbox"/> |  |
| AN ORTEN AUSSERHALB DER STADT ODER DER ORTSCHAFT, IN DER SIE LEBEN?<br><i>LIFE-SPACE 5</i>                                                                  |  |  | <b>LS5</b>                                                                                     | <input type="checkbox"/> | <input type="checkbox"/>    | <b>LS5-Häufigkeit</b>    |                                                     |                          |                          | <b>LS5-Hilfsmittel</b>                                  |                          |                          | <b>LS5-Persönliche Hilfe</b> |                          |  |
|                                                                                                                                                             |  |  | <input type="checkbox"/>                                                                       | <input type="checkbox"/> | <input type="checkbox"/>    | <input type="checkbox"/> | <input type="checkbox"/>                            | <input type="checkbox"/> | <input type="checkbox"/> | <input type="checkbox"/>                                | <input type="checkbox"/> | <input type="checkbox"/> | <input type="checkbox"/>     | <input type="checkbox"/> |  |

# BMJ Open

## Validation of the German Life-Space Assessment LSA-D: Cross sectional validation study in urban and rural community-dwelling older adults

|                                 |                                                                                                                                                                                                                                                                                                                                                                                                                                                                                                                                                                                                                              |
|---------------------------------|------------------------------------------------------------------------------------------------------------------------------------------------------------------------------------------------------------------------------------------------------------------------------------------------------------------------------------------------------------------------------------------------------------------------------------------------------------------------------------------------------------------------------------------------------------------------------------------------------------------------------|
| Journal:                        | <i>BMJ Open</i>                                                                                                                                                                                                                                                                                                                                                                                                                                                                                                                                                                                                              |
| Manuscript ID                   | bmjopen-2021-049926.R1                                                                                                                                                                                                                                                                                                                                                                                                                                                                                                                                                                                                       |
| Article Type:                   | Original research                                                                                                                                                                                                                                                                                                                                                                                                                                                                                                                                                                                                            |
| Date Submitted by the Author:   | 02-Jun-2021                                                                                                                                                                                                                                                                                                                                                                                                                                                                                                                                                                                                                  |
| Complete List of Authors:       | Mümken, Sandra Angelika; Charité Universitätsmedizin Berlin, Institute of Medical Sociology and Rehabilitation Science<br>Gellert, Paul; Charité Universitätsmedizin Berlin, Institute of Medical Sociology and Rehabilitation Science<br>Stollwerck, Malte; Charité Universitätsmedizin Berlin, Institute of Medical Sociology and Rehabilitation Science<br>O'Sullivan, Julie Lorraine; Charité Universitätsmedizin Berlin, Institute of Medical Sociology and Rehabilitation Science<br>Kiselev, Joern; Charité Universitätsmedizin Berlin, Department of Anesthesiology and Operative Intensive Care Medicine (CCM, CVK) |
| <b>Primary Subject Heading</b>: | Rehabilitation medicine                                                                                                                                                                                                                                                                                                                                                                                                                                                                                                                                                                                                      |
| Secondary Subject Heading:      | Geriatric medicine, Public health, Diagnostics, Evidence based practice                                                                                                                                                                                                                                                                                                                                                                                                                                                                                                                                                      |
| Keywords:                       | Rehabilitation medicine < INTERNAL MEDICINE, GERIATRIC MEDICINE, SOCIAL MEDICINE                                                                                                                                                                                                                                                                                                                                                                                                                                                                                                                                             |
|                                 |                                                                                                                                                                                                                                                                                                                                                                                                                                                                                                                                                                                                                              |

SCHOLARONE™  
Manuscripts



I, the Submitting Author has the right to grant and does grant on behalf of all authors of the Work (as defined in the below author licence), an exclusive licence and/or a non-exclusive licence for contributions from authors who are: i) UK Crown employees; ii) where BMJ has agreed a CC-BY licence shall apply, and/or iii) in accordance with the terms applicable for US Federal Government officers or employees acting as part of their official duties; on a worldwide, perpetual, irrevocable, royalty-free basis to BMJ Publishing Group Ltd ("BMJ") its licensees and where the relevant Journal is co-owned by BMJ to the co-owners of the Journal, to publish the Work in this journal and any other BMJ products and to exploit all rights, as set out in our [licence](#).

The Submitting Author accepts and understands that any supply made under these terms is made by BMJ to the Submitting Author unless you are acting as an employee on behalf of your employer or a postgraduate student of an affiliated institution which is paying any applicable article publishing charge ("APC") for Open Access articles. Where the Submitting Author wishes to make the Work available on an Open Access basis (and intends to pay the relevant APC), the terms of reuse of such Open Access shall be governed by a Creative Commons licence – details of these licences and which [Creative Commons](#) licence will apply to this Work are set out in our licence referred to above.

Other than as permitted in any relevant BMJ Author's Self Archiving Policies, I confirm this Work has not been accepted for publication elsewhere, is not being considered for publication elsewhere and does not duplicate material already published. I confirm all authors consent to publication of this Work and authorise the granting of this licence.

**Validation of the German Life-Space Assessment LSA-D:****Cross sectional validation study in urban and rural community-dwelling older adults**Sandra A. Mümken<sup>1</sup>Paul Gellert<sup>1</sup>Malte Stollwerck<sup>1</sup>Julie L. O'Sullivan<sup>1</sup>Joern Kiselev<sup>2</sup>

<sup>1</sup> *Institute of Medical Sociology and Rehabilitation Science, Charité – Universitätsmedizin Berlin, Germany, corporate member of Freie Universität Berlin, Humboldt-Universität zu Berlin, and Berlin Institute of Health, Charitéplatz 1, D-10117 Berlin, Germany*

<sup>2</sup> *Department of Anesthesiology and Operative Intensive Care Medicine (CCM, CVK), Charité Universitätsmedizin Berlin, corporate member of Freie Universität Berlin, Humboldt-Universität zu Berlin, and Berlin Institute of Health, Charitéplatz 1, D-10117 Berlin, Germany*

*Corresponding author:*

Sandra A. Mümken

Institute of Medical Sociology and Rehabilitation Science

Charitéplatz 1 10117 Berlin

sandra.muemken@charite.de

Wordcount: 4.264

**Abstract**

**Objectives** To develop a German version of the original University of Alabama at Birmingham (UAB) Study of Aging Life-Space Assessment (LSA-D) for measurement of community mobility in older adults within the past 4 weeks and to evaluate its construct validity for urban and rural populations of older adults.

**Design** Cross-sectional validation study.

**Setting** Two study centres in urban and rural German outpatient hospital settings.

**Participants** In total N=83 community-dwelling older adults were recruited (n=40 from urban and n=43 from rural areas; mean age was 78.5 (SD=5.4); 49% male).

**Primary and secondary outcome measures** The final version of the translated LSA-D was related with limitations in activities and instrumental activities of daily living (ADL/iADL) as primary outcome measure (primary hypothesis) and with sociodemographic factors, functional mobility, self-rated health, balance confidence and history of falls as secondary outcome measures to obtain construct validity. Further descriptive measurements of health included handgrip strength, screening of cognitive function, comorbidities and use of transportation. To assess construct validity, correlations between LSA-D and the primary and secondary outcome measures were examined for the total sample, and urban and rural subsamples using bivariate regression and multiple adjusted regression models. Descriptive analyses of LSA-D included different scoring methods for each region. All parameters were estimated using non-parametric bootstrapping procedure.

**Results** In the multiple adjusted model for the total sample, number of ADL/iADL limitations ( $\beta=-.26$ ; 95%CI=-.42/-.08), TUG ( $\beta=-.37$ ; 95%CI=-.68/-.14), shared living arrangements ( $\beta=.22$ ; 95%CI=.01/.44) and history of falls in the past 6 months ( $\beta=-.22$ ; 95%CI=-.41/-.05) showed significant associations with the LSA-D composite score, while living in urban area ( $\beta=-.19$ ; 95%CI=-.42/.03) and male gender ( $\beta=.15$ ; 95%CI=-.04/.35) were not significant.

1 **Conclusion** The LSA-D is a valid tool for measuring life-space mobility in German  
2 community-dwelling older adults within the past four weeks in ambulant urban and rural  
3 settings.

4  
5 **Trial registration number** DRKS00019023

6 *Keywords:* Older adults; Mobility; Life-space; German; Validation; living environment;  
7 geriatrics,

8  
9 **Strengths and limitations of this study**

- 10 • German validation of the original UAB Life-Space Assessment (LSA-D) for community  
11 dwelling older adults in urban and rural settings
- 12 • Using bootstrapped bivariate and multiple adjusted regression models to attain construct  
13 validity of the LSA-D
- 14 • Recruitment had to be stopped shortly before reaching the calculated sample size due to the  
15 decision to restrict in face-to-face research to contain the outbreak of the Covid-19  
16 pandemic in March 2020

## Introduction

Mobility, defined as “the ability to move oneself (either independently or by using assistive devices or transportation) within environments that expand from one’s home to the neighbourhood and regions beyond”[1] encompasses general independence, opportunities for social activities and freedom to experience new sites. This broad concept of mobility goes beyond the narrow conception of mobility as performance in a single functional test without considering environmental barriers and social resources although their impact on mobility has been investigated.[2, 3] Therefore, the focus on single functional mobility tests can lead to misconceptions about actual mobility performance in everyday life and health practitioners may oversee possible consequences for social participation and mental health.[4]

To overcome these shortcomings of functional mobility assessments, recent studies of mobility and aging operationalize mobility as circled areas, so-called life-spaces, that spread from the centre of one’s own house and garden to the neighbourhood, the city lived in and beyond, with each life-space offering different opportunities for social involvement, recreational activities or access to medical care.[5, 6] The application of self-reported life-spaces to determine mobility of older adults was first established by May et al. in 1985[7] and assessment of life-space mobility with standardized questionnaires was recently recommended for geriatric research.[8]

Several instruments for measuring life-space mobility in specific populations and settings exist, including assessments of life-space within one’s own residence for home-bound individuals[9] or residents in nursing homes and other institutions.[10, 11]

One of the most frequently applied instruments for measurement of mobility in older adults using the life-space concept is the validated Life-Space Assessment (LSA) by Baker et al.[12] as part of the University of Alabama at Birmingham (UAB). Study of Aging. The LSA provides health professionals in geriatric settings with information on availability of environmental and

1 social resources as an outcome of mobility assessment and gives them a more comprehensive  
2 picture of the patient's needs.

3 The importance of the LSA for clinical practice has been shown in various studies. Kennedy et  
4 al.[13] for instance found that a decline in life-space mobility over six months is associated with  
5 greater mortality in the following six months. Limitations in life-space mobility are associated  
6 with long-term mortality of older men[14], cognitive decline[15], fall risk [16], frailty[17] and  
7 hospital admission in older adults with heart failure.[18] Furthermore, the concept has already  
8 been established in outpatient physical therapy with various community-dwelling neurological  
9 orthopaedic and surgery patients.[19] Additionally, psychological health factors like external  
10 control beliefs [20] and personal activity goals [21] influence life-space mobility. Therefore,  
11 the LSA can also supplement evaluation concepts in psychological research and treatment of  
12 older adults. The construct validity of the LSA was commonly tested by relating the LSA to  
13 activities and instrumental activities of daily living (ADL/iADL) but also self-rated health and  
14 fears of falling.[22, 23, 24] Moreover, as pointed out by Baker et al.[12], there is a need to  
15 validate the LSA for urban and rural settings. Recently published studies also indicate  
16 environmental factors, such as distance to services or quality of streets and sidewalks, that differ  
17 between urban and rural settings might influence life-space mobility by reducing or maximising  
18 the opportunities to move independently outdoors and participate in social activities.[25]

19 As part of validity testing, the LSA has been translated into multiple languages such as  
20 Chinese[26], French[24], Spanish[22], Swedish[27] or Danish[28]. To date, two modified  
21 German versions for assessment of life-space mobility in specific populations of older adults  
22 exist: the LSA-CI captures life-space mobility of the past week for those with mild cognitive  
23 impairment [23]. In comparison, the LSA-IS is used in institutionalized settings where life-  
24 spaces are adapted to the living environment of care facilities and life-space mobility of the  
25 previous day is captured.[11, 29] However, a validated and intercultural adapted version of  
26 the original LSA that can be administered in the context of a more general geriatric setting in



1 the overall population of community-dwelling older adults is still missing. Therefore, we  
2 conducted a validation study of a German version of the original LSA (LSA-D) (see online  
3 supplement S1.) in urban and rural areas.

#### 4 **Aims and hypotheses**

5 Our aim was to translate, apply and validate the LSA-D, a German version of the LSA from the  
6 UAB Study of Aging for the population of urban and rural community-dwelling older adults.  
7 In line with the original validation of the LSA we expected a moderate association of the LSA-D  
8 composite score with limitations in ADL/iADL as primary hypothesis.[12] As secondary  
9 hypothesizes, we assumed moderate associations with sociodemographic measures[12, 22],  
10 functional mobility[23, 30] self-rated health[12, 22], balance confidence and history of falls[16,  
11 31]. In a further step we investigated the independent predictive validity of the proposed factors  
12 (limitations in ADL/iADL, sociodemographic measures, functional mobility, self-rated health,  
13 balance confidence and history of falls) assuming that the primary correlation of limitations in  
14 ADL/iADL is present even after adjustment for the other constructs. Finally, we expected the  
15 newly translated LSA-D to show patterns of similar strong associations in the urban and rural  
16 subsample.

## 17 **Methods**

### 18 **Study design**

19 A cross-sectional study design was used with two German hospital clinics as study  
20 centres. The first study centre was an ambulant geriatric rehabilitation facility of the Havelland  
21 clinics located in a small town (16,000 inhabitants) in Brandenburg, Germany. The second  
22 centre was based at the Charité – Universitätsmedizin Berlin within the Department of  
23 Anesthesiology and Operative Intensive Care. Approval for the study was given by the  
24 local Ethics Committee of the Charité – Universitätsmedizin Berlin (EA2/124/19) and the study  
25 was prospectively registered at the German Clinical Trials Register (DRKS00019023).

1  
2  
3 1 Sample size calculation was based on assumptions to find a moderate-to-strong association  
4  
5 2 of beta/ $r=-.40$ [12] between the LSA-D-composite score and limitations in ADL/iADL  
6  
7 3 (i.e., primary hypothesis), sociodemographic measures, functional mobility, self-rated health  
8  
9 4 and balance confidence in all observed populations. For testing of the primary hypothesis,  
10  
11 5 92 participants or 46 subjects per setting (i.e., urban/rural) were required. This was based on  
12  
13 6 the following assumptions: An effect size of Pearson's correlation coefficient or standardized  
14  
15 7 beta coefficient of  $r/\text{beta}=-0.40$  ( $\rho=-0.40$  in the population) was assumed in reference to the  
16  
17 8 association between the LSA composite score (LS-C) and limitations in ADL/iADL found in  
18  
19 9 the original validation study of LSA.[12] The power calculation with GPower 3.1 for bivariate  
20  
21 10 correlations (test family "exact")[32] resulted in an estimated minimum sample size of  $n=46$   
22  
23 11 participants per setting (urban/rural) and a critical  $r=-0.29$  with a type I error rate of  $\alpha=0.025$   
24  
25 12 (test one-sided; corrected for multiple testing [setting urban/rural;  $\alpha=0.05/2$ ]) and a  
26  
27 13 statistical power of  $1-\beta=0.80$ . Recruitment commenced in November 2019 and had to be  
28  
29 14 stopped in March 2020 at a sample size of 82 due to restrictions of the then starting coronavirus  
30  
31 15 pandemic. A post hoc sensitivity analysis suggests that we are still able to detect effects of  
32  
33 16  $r=-.30$  and larger.  
34  
35  
36  
37  
38  
39  
40  
41

## 42 18 **Translation process**

43  
44 19 In accordance with the 2008 guidelines of the World Health Organization[33], forward  
45  
46 20 translation into German language was separately conducted by two researchers who formulated  
47  
48 21 two German versions that were discussed and then merged into one German pre-version of the  
49  
50 22 LSA-D. The pre-version was given to two native English speakers for back translation. Again,  
51  
52 23 both versions of the back translation were discussed by the two native speakers and a concerted  
53  
54 24 version of the back-translation was produced. Differences between the original LSA and the  
55  
56 25 concerted back-translation were discussed and reviewed with the original author of the LSA to  
57  
58 26 redefine a pre-final version of the LSA-D that was pre-tested for understandability using  
59  
60

1  
2  
3 1 cognitive interview technique among 4 older adults of the Charité – Universitätsmedizin Berlin  
4  
5 2 to create the final LSA-D version.[34]  
6  
7  
8 3  
9

#### 10 4 **Participants and recruitment**

11  
12 5 The 83 participants were divided into two groups mainly based on the size of their place  
13  
14 6 of residence and taking Chistaller's theory of "central places" into consideration that  
15  
16 7 categorizes living areas based on provided services and infrastructure.[35] Participants from  
17  
18 8 villages (up to 5,000 inhabitants) and small towns (up to 40,000 inhabitants) were classified as  
19  
20 9 living in rural areas as some towns missed to provide services of upscale daily needs  
21  
22 10 (e.g. public swimming pools). In contrast, participants who lived in the city of Berlin  
23  
24 11 (3.8 million inhabitants) with its metropolitan infrastructure and services were classified as  
25  
26 12 urban population.  
27  
28  
29

30 13 Inclusion criteria were defined as: age of 70 years and older; ability to read and  
31  
32 14 understand the questionnaire and give written informed consent. Exclusion criteria were  
33  
34 15 incidences that limited mobility within the past four weeks, known diagnosed severe cognitive  
35  
36 16 limitations or mental conditions, need of acute care and insufficient understanding of the  
37  
38 17 German language. In total, 126 persons were screened for eligibility of which 28 did not fulfil  
39  
40 18 the inclusion criteria and 15 were unwilling to participate. In both study centres, participants  
41  
42 19 were recruited during normal health care routine by trained study staff and medical  
43  
44 20 professionals were consulted by any uncertainty regarding the participant's eligibility. All  
45  
46 21 participants received verbal and written information on the study and were given time to  
47  
48 22 consider participation before giving written consent.  
49  
50  
51  
52  
53  
54  
55  
56  
57  
58  
59  
60

## Measures

Selection of primary and secondary variables for determining construct validity was based on the original validation study of the UAB and other LSA validation studies from different countries. [12, 22, 23, 31]

### *Primary outcome measures*

Life-space mobility was evaluated with the translated German Version of the UAB Life-Space Assessment. The LSA consists of a questionnaire on five different life-spaces capturing six possible levels of life-space (0. mobility within the bedroom; 1. rooms inside the home besides the bedroom; 2. area outside the house; 3. neighbourhood; 4. town or city lived in; 5. outside of town or city lived in). For each level, participants were asked a) if they went to this level in the past four weeks, b) if so, how often, c) if they needed assistive devices or special equipment to reach that level and d) if they needed personal help to reach that level.[12]

Different scoring methods can be used with the LSA either indicating the maximum attained life-space level (LS-M), life-space that can be reached independently without any further support (LS-I), reachable life-space with possible use of equipment but without personal help (LS-E), dichotomized life-space (LS-D) that classifies a person's mobility into the ability to travel beyond the borders of their self-perceived neighbourhood and the composite score (LS-C) that summarizes the attained LS-level, needed equipment or personal support and frequency of visits. The LS-C score ranges from 0 to 120 points with higher scores indicating better mobility. As the LS-C score has shown a good sensitivity regarding change over time, it is frequently applied in longitudinal studies.[36, 37] In cross-sectional studies, LS-I and LS-D are additional scores for describing actual mobility and associations with other health factors.[12]

Limitations in ADL/iADL were investigated using questions from the "Survey of Aging and Retirement in Europe" (SHARE).[38] Participants were asked whether they had difficulties due to physical, emotional or cognitive problems to perform 15 activities like dressing,

1  
2  
3 1 gardening, using a map or making a telephone call. Binary response options for each activity  
4  
5 2 were yes or no. Subsequently, a sum score of limitations in ADL/iADL activities was calculated  
6  
7 3 ranging from 0 to 15. Higher scores indicate more functional impairments.  
8  
9

#### 10 4 ***Secondary outcome measures***

11  
12 5 Sociodemographic factors (i.e., age, gender, height, weight, status of shared living-  
13  
14 6 arrangements) use of public transportation and driving-status were assessed with a standardized  
15  
16 7 questionnaire.  
17  
18

19 8 The “Timed-Up&Go-Test” TUG is one of the most frequently used measures of  
20  
21 9 balance and functional mobility in older adults and is a recommended tool for geriatric  
22  
23 10 assessment.[39] During performance of the TUG, time (in seconds) is taken for rising up from  
24  
25 11 a standardized chair, walking three metres, turning around, walking back and sitting down again  
26  
27 12 at a comfortable self-selected speed.[40] Higher TUG times are associated with impaired  
28  
29 13 mobility.[41, 42]  
30  
31  
32

33 14 The EQ-VAS from the EQ-5D-5L version was used to record overall self-rated health  
34  
35 15 of the day on a vertical visual analogue scale ranging from 0 points for the worst imaginable  
36  
37 16 health to 100 points for the best conceivable health.[43] To measure balance confidence, we  
38  
39 17 used the ABC-6-Scale that was translated into German and validated by Schott et al.[44]  
40  
41 18 Participants were accounted to have a history of falls if they had fallen at least one time in the  
42  
43 19 past six months using the criteria of the “Frailty and Injuries: Cooperative Studies of  
44  
45 20 Intervention Techniques” to define a fall.[45]  
46  
47  
48

#### 49 21 ***Further descriptive measures of health***

50  
51 22 Hand grip strength was measured as maximum of three contractions with a hydraulic handheld  
52  
53 23 dynamometer (Saehan SH5001; Changwon, South Korea) in the dominant hand and  
54  
55 24 standardized sitting position.[46] We administered the Charlson comorbidity index (CCI) as a  
56  
57 25 method to categorize comorbidities (0-41 points) where scores of >5 indicate a higher mortality  
58  
59 26 risk.[47] Cognitive status was assessed with the Mini-Cog screening tool where a score ranging  
60

1 from 0-5 can be achieved and a score of 0-2 is seen as an indicator for further investigation of  
2 cognitive status.[48]

#### 3 4 **Statistical analysis**

5 Means (M) and standard deviations (SD) were reported descriptively for continuous  
6 demographic variables (i.e., age, height, weight) and health measures (i.e., limitations in  
7 ADL/iADL, time in seconds needed to complete TUG, self-rated health and balance  
8 confidence). Gender, status of shared living arrangements, use of different transportation modes  
9 and history of falls were reported for the total and each subsample as absolute frequencies and  
10 percentage of participants. Distribution of the data was skewed therefore we used the non-  
11 parametric, bias corrected and accelerated (BCA) bootstrap method with 10,000 resamples and  
12 fixed random seeds that resamples the collected data with replacement to derive robust  
13 results.[49] With the BCA bootstrap method, coefficients and confidence intervals can be  
14 estimated with good statistical power even if sample sizes are small and distribution of data is  
15 unknown or not normal. For investigating differences between urban and rural participants, the  
16 Welch Test was performed as it has been recommended as a standard test for small samples.[50]  
17 To determine construct validity of the LSA-D, BCA bootstrap method and standardized  
18 z-scores (i.e., that can be interpreted like beta coefficients) of the included binary and  
19 continuous variables (i.e., age, male gender, rural or urban residence, status of shared living  
20 arrangements, sum score of limitations with ADL/iADL activities, functional mobility with  
21 TUG, self-rated health and history of falls) were used for bivariate and multivariate regression  
22 analysis. Balance confidence (scores of the ABC-6 scale) had to be excluded from multivariate  
23 regression because they revealed a correlation of  $r=-.72$  with TUG scores. To avoid  
24 multicollinearity, it was decided to include only the TUG score due to its importance as a  
25 physical measurement of functional mobility for assessing construct validity. All analyses were  
26 run using SPSS version 25. Microsoft Excel 2016 was used to create the figure.

## 1 2 3 1 **Results**

### 4 5 6 2 **Sample characteristics**

7  
8  
9 3 For the total sample (N=83), mean age was 78.5 (SD=5.4) years and about half of the  
10  
11 4 sample (n=41; 49.4%) were male. 47 participants (56.6%) lived together with others in a shared  
12  
13 5 living arrangement. In the past four weeks, 39 participants (47.0%) drove a car by themselves,  
14  
15 6 18 participants (21.7%) rode a bicycle and 34 participants (41.0%) used walking aids. On  
16  
17 7 average, participants had a TUG of M=13.90 (SD=9.20) seconds. Score of limitations in  
18  
19 8 ADL/iADL was moderate with M=7.8 (SD=6.2) and mean score of self-rated health was  
20  
21 9 M=64.7 (SD=21.3).

22  
23  
24  
25 10 When comparing urban with rural participants, those living in urban areas had  
26  
27 11 significantly more ADL/iADL limitations,  $t(74.51)=-2.34$ ;  $p=.022$ , and comorbidities,  
28  
29 12  $t(57.27)=-2.44$ ;  $p=.018$ . Rural participants were significantly older,  $t(81)=2.43$ ;  $p=.017$ , needed  
30  
31 13 more time to complete the TUG,  $t(70.65)=3.33$ ;  $p=.001$ , had less balance confidence,  
32  
33 14  $t(80.11)=-2.84$ ;  $p=.006$  and had lower self-rated health,  $t(81)=-2.45$ ;  $p=.016$ . Concerning the  
34  
35 15 utilization of means of transportation, the percentage of participants who drove a car or a bicycle  
36  
37 16 for independent mobility within the last 4 weeks did not differ significantly across regions.  
38  
39 17 Characteristics of participants in total and separately for each region are presented in table 1.

40  
41  
42  
43 18  
44  
45  
46  
47  
48  
49  
50  
51  
52  
53  
54  
55  
56  
57  
58  
59  
60

Table 1: Participant Characteristics

| Variable                               | total (N=83) |           | urban (n=40) |           | rural (n=43)     |           |
|----------------------------------------|--------------|-----------|--------------|-----------|------------------|-----------|
|                                        | N            | %         | N            | %         | N                | %         |
| Gender (male)                          | 41           | 49.4      | 23           | 57.5      | 18               | 41.9      |
| Status of shared living arrangements   | 47           | 56.6      | 19           | 47.5      | 28               | 65.1      |
| Drove a car in past 4 weeks            | 39           | 47.0      | 18           | 45.0      | 21               | 48.8      |
| Rode a bicycle in past 4 weeks         | 18           | 21.7      | 9            | 22.5      | 9                | 20.9      |
| Used walking aid in past 4 weeks       | 34           | 41.0      | 11           | 27.5      | 23               | 53.5      |
| History of falls past 6 months (>1)    | 22           | 26.5      | 9            | 22.5      | 13               | 30.2      |
|                                        | <i>M</i>     | <i>SD</i> | <i>M</i>     | <i>SD</i> | <i>M</i>         | <i>SD</i> |
| Age (years)                            | 78.5         | 5.4       | 77.1         | 5.2       | <b>79.8*</b>     | 5.2       |
| Height (cm)                            | 168.7 (3)    | 10.5      | 170.8        | 11.2      | 166.5 (3)        | 9.3       |
| Weight (kg)                            | 79.0 (3)     | 18.8      | 79.7         | 19.8      | 78.3 (3)         | 17.8      |
| Body Mass Index                        | 27.6 (3)     | 5.4       | 27.1         | 5.8       | 28.1 (3)         | 5.1       |
| Charlson Comorbidity Index (0-41)      | 3.2          | 3.6       | <b>4.2*</b>  | 4.5       | 2.3              | 2.3       |
| Hand grip strength (kg)                | 25.8 (2)     | 11.6      | 27.7 (1)     | 11.8      | 24.0 (1)         | 11.4      |
| Mini-Cog™-Score (0-5)                  | 3.8          | 1.5       | 3.8          | 1.6       | 3.8              | 1.4       |
| LSA-D composite score (0-120)          | 60.8         | 24.3      | 58.0         | 21.7      | 63.3             | 26.5      |
| ADL/iADL (number of limitations; 0-15) | 7.8          | 6.2       | <b>9.4*</b>  | 6.7       | 6.2              | 5.4       |
| TUG (s)                                | 13.9 (5)     | 9.2       | 10.5 (3)     | 6.8       | <b>16.9**(2)</b> | 10.1      |
| Self-rated health (0-100)              | 64.8         | 21.3      | 70.5         | 19.3      | <b>59.4*</b>     | 21.8      |
| Balance confidence (0-100)             | 57.8         | 32.7      | 67.8         | 28.4      | <b>48.4*</b>     | 34.0      |

Note: Live-Space-Assessment-Deutsch (LSA-D); Activities of Daily Living (ADL); Instrumented Activities of Daily Living (iADL); Timed-Up &Go-Test (TUG); Numbers in brackets report number of missing values;

\* significant difference between subsamples ( $p < .05$ )

\*\* significant difference between subsamples ( $p < .001$ )



## 1 **Descriptive statistics of the LSA-D**

2 Life-space-level 5, as maximum life-space (LS-M), was reached by 60.2% of the total  
3 sample. 32.5% of all participants had an independent life-space level (LS-I) of 5 while the  
4 remaining needed either equipment or personal help. For the urban subsample, 40.0% of the  
5 participants reached life-space level 5 as LS-M and 27.5% of urban participants reached life-  
6 space level 5 independently without any support (LS-I). In contrast, 79.1% of rural participants  
7 achieved LS-level 5 as LS-M and 37.2% did this independently without any support (LS-I).  
8 Figure 1 illustrates the different life-space measures among the total sample and urban/rural  
9 subsample. No significant differences between urban and rural participants were observed in  
10 LS-C: ( $t(81)=1.00$ ;  $p=.323$ ), LS-E: ( $t(81)=0.57$ ;  $p=.571$ ), and  
11 LS-D: ( $t(80.99)=-1.95$ ;  $p=.054$ ). Rural participants had a significantly higher LS-M:  
12 ( $t(64.60)=3.83$ ;  $p<.001$ ), and LS-I: ( $t(77)=-2.00$ ;  $p=.049$ ).

## 14 **Construct validity**

15 For the total sample, associations from the bivariate regression analyses between the  
16 LSA-D composite score, demographic variables, functional mobility and other health measures  
17 were significant for age ( $\beta=-.24$ ; 95%CI $=-.44/-.07$ ;  $p=.016$ ), status of shared living  
18 arrangements ( $\beta=.22$ ; 95%CI $=.01/.43$ ;  $p=.040$ ) ADL/iADL ( $\beta=-.23$ ; 95%CI $=-.43/-.01$ ;  $p=.034$ ),  
19 TUG ( $\beta=-.47$ ; 95%CI $=-.66/-.34$ ;  $p<.001$ ), self-rated health ( $\beta=.40$ ; 95%CI $=.19/.61$ ;  $p<.001$ ),  
20 history of falls ( $\beta=-.35$ ; 95%CI $=-.54/-.15$ ;  $p<.001$ ). Male gender ( $\beta=-.09$ ; 95%CI $=-.31/.13$ ;  
21  $p=.407$ ) and urban residence ( $\beta=-.11$ ; 95%CI $=-.33/.10$ ;  $p=.314$ ) were not significant for the total  
22 sample. In the adjusted model, age, male gender, urban residence, status of shared living  
23 arrangements, number of limitations in ADL/iADL, TUG, self-rated health and history of falls  
24 were included into the equation in one step for the total sample. The result revealed significant  
25 associations for living status in shared living arrangements ( $\beta=.22$ ; 95%CI $=.01/.44$ ;  $p=.045$ ),  
26 limitations in ADL/iADL activities ( $\beta=-.26$ ; 95%CI $=-.42/-.08$ ;  $p=.008$ ), functional mobility

1 measured with the TUG ( $\beta=-.37$ ; 95%CI $=-.68/-14$ ;  $p=.008$ ) and history of falls ( $\beta=-.22$ ;  
 2 95%CI $=-.41/-05$ ;  $p=.018$ ). No significant associations were found for male gender ( $\beta=.15$ ;  
 3 95%CI $=-.04/.35$ ;  $p=.135$ ) and urban residence ( $\beta=-.19$ ; 95%CI $=-.42/.03$ ;  $p=.090$ ), which  
 4 corresponds with the bivariate model. However, in contrast to bivariate models, influence of  
 5 age ( $\beta=-.08$ ; 95%CI $=-.32/.12$ ;  $p=.509$ ) and self-rated health ( $\beta=.24$ ; 95%CI $=.02/.47$ ,  $p=.058$ )  
 6 were not significant in the multivariate model. Results of bivariate and adjusted multivariate  
 7 regression models are shown in table 2.

Table 2: Unadjusted and adjusted associations of sociodemographic and health factors with the LSA-D composite score (N=83)

| Variable                             | <i>Bivariate unadjusted models</i> |                      |                  | <i>Adjusted model</i> |                      |             |
|--------------------------------------|------------------------------------|----------------------|------------------|-----------------------|----------------------|-------------|
|                                      | <i>Beta</i>                        | <i>LL CI / UL CI</i> | <i>p</i>         | <i>Beta</i>           | <i>LL CI / UL CI</i> | <i>p</i>    |
| Age                                  | <b>-.24</b>                        | <b>-.44/-07</b>      | <b>.016</b>      | -.08                  | -.32/.12             | .509        |
| Gender (male)                        | -.09                               | -.31/.13             | .407             | .15                   | -.04/.35             | .135        |
| Status of shared living arrangements | <b>.22</b>                         | <b>.01/.43</b>       | <b>.040</b>      | <b>.22</b>            | <b>.01/.44</b>       | <b>.045</b> |
| Lives in urban area                  | -.11                               | -.33/.10             | .314             | -.19                  | -.42/.03             | .090        |
| ADL/iADL-Score                       | <b>-.23</b>                        | <b>-.43/-01</b>      | <b>.034</b>      | <b>-.26</b>           | <b>-.42/-08</b>      | <b>.008</b> |
| TUG                                  | <b>-.47</b>                        | <b>-.66/-34</b>      | <b>&lt; .001</b> | <b>-.37</b>           | <b>-.68/-14</b>      | <b>.008</b> |
| Self-rated health                    | <b>.40</b>                         | <b>.19/.61</b>       | <b>&lt; .001</b> | .24                   | .02/.47              | .058        |
| Balance confidence                   | <b>.50</b>                         | <b>.33/.67</b>       | <b>&lt; .001</b> | -                     | -                    | -           |
| History of falls in past 6 months    | <b>-.35</b>                        | <b>-.54/-15</b>      | <b>&lt; .001</b> | <b>-.22</b>           | <b>-.41/-05</b>      | <b>.018</b> |

Notes: Timed-Up&Go-Test (TUG); Activities of Daily Living (ADL); Instrumental Activities of Daily Living (iADL);  
 p < .05 highlighted in bold

1  
2  
3 1 Separate bivariate regression analyses for the urban and rural region demonstrated comparable  
4  
5 2 results in the urban and rural subsample for TUG urban: ( $\beta=-.48$ ; 95%CI=-1.14/-.32;  $p=.008$ )  
6  
7 3 and rural: ( $\beta=-.60$ ; 95%CI=-.95/-.40;  $p<.001$ ), self-rated health urban: ( $\beta=.51$ ; 95%CI=.29/.90;  
8  
9 4  $p=.001$ ) and rural: ( $\beta=.43$ ; 95%CI=.12/.77;  $p=.010$ ), balance confidence urban: ( $\beta=.67$ ;  
10  
11 5 95%CI=.38/.93;  $p=<.001$ ) and rural: ( $\beta=.54$ ; 95%CI=.29/.81;  $p=.001$ ) and history of falls urban:  
12  
13 6 ( $\beta=-.31$ ; 95%CI=-.59/-.03;  $p=.030$ ) and rural: ( $\beta=-.41$ ; 95%CI=-.67/-.11;  $p=.009$ ). Age was  
14  
15 7 significant for those living in the urban region ( $\beta=-.31$ ; 95%CL=-.53/-.09;  $p=.011$ ), but not for  
16  
17 8 the rural sample ( $\beta=-.28$ ; 95%CI=-.68/.03;  $p=.147$ ). All other demographic variables and health  
18  
19 9 measures showed no significant associations in both groups. Results are presented in table 3.  
20  
21  
22  
23  
24  
25

26 11 Calculations of the adjusted model for each subsample separately showed a significant  
27  
28 12 regression coefficient in the urban sample for the score of ADL/iADL limitations ( $\beta=-.23$ ;  
29  
30 13 95%CI=-.41/-.10;  $p=.035$ ) while coefficients for all other variables were not significant. For the  
31  
32 14 rural population, results for status of shared living arrangements ( $\beta=.39$ ; 95%CI=.02/.75;  
33  
34 15  $p=.039$ ) and history of falls ( $\beta=-.42$ ; 95%CI=-.80/-.08;  $p=.04$ ) showed significance while other  
35  
36 16 variables did not.  
37  
38  
39  
40  
41  
42  
43  
44  
45  
46  
47  
48  
49  
50  
51  
52  
53  
54  
55  
56  
57  
58  
59  
60

Table 3: Unadjusted associations of sociodemographic and health factors with LSA-D composite score for participants in urban (n=40) and rural areas (n=43)

| Variable                             | Urban       |                      |                  | Rural       |                      |                  |
|--------------------------------------|-------------|----------------------|------------------|-------------|----------------------|------------------|
|                                      | <i>Beta</i> | <i>LL CI / UL CI</i> | <i>p</i>         | <i>Beta</i> | <i>LL CI / UL CI</i> | <i>P</i>         |
| Age                                  | <b>-.31</b> | <b>-.53/-.09</b>     | <b>.011</b>      | -.28        | -.68/.03             | .147             |
| Gender (male)                        | -.20        | -.43/.06             | .151             | -.04        | -.38/.29             | .826             |
| Status of shared living arrangements | .18         | -.11/.45             | .231             | .24         | -.10/.54             | .150             |
| ADL/iADL-Score                       | -.16        | -.39/.11             | .209             | -.28        | -.71/.11             | .208             |
| TUG                                  | <b>-.48</b> | <b>-1.14/-.32</b>    | <b>.008</b>      | <b>-.60</b> | <b>-.95/-.40</b>     | <b>&lt; .001</b> |
| Self-rated health                    | <b>.51</b>  | <b>.29/.90</b>       | <b>.001</b>      | <b>.43</b>  | <b>.12/.77</b>       | <b>.010</b>      |
| Balance confidence                   | <b>.67</b>  | <b>.38/.93</b>       | <b>&lt; .001</b> | <b>.54</b>  | <b>.29/.81</b>       | <b>.001</b>      |
| History of falls in past 6 month     | <b>-.31</b> | <b>-.59/-.03</b>     | <b>.030</b>      | <b>-.41</b> | <b>-.67/-.11</b>     | <b>.009</b>      |

Notes: Timed-Up&Go-Test (TUG); Activities of Daily Living (ADL); Instrumental Activities of Daily Living (iADL); p < .05 highlighted in bold

## Discussion

1  
2  
3 1  
4  
5  
6 2 We translated and validated a German version of the LSA in urban and rural community-  
7  
8 dwelling older adults. In line with the original validation of the LSA[12], moderate associations  
9 3  
10 of the LSA-D composite score with limitations in ADL/iADL, living in shared living  
11 4  
12 arrangements as well as with functional mobility assessed with the TUG and history of falls  
13 5  
14 were found in the bivariate regression and standardized adjusted model. The standardized  
15 6  
16 adjusted association of limitations in ADL/iADL with the LSA-D composite score revealed in  
17 7  
18 our study is in line with findings of Baker et al.[12] and Curcio[22], albeit lower than expected.  
19 8  
20 We found stronger moderate adjusted associations for functional mobility measured with the  
21 9  
22 TUG. These results correspond with findings by Ullrich et al.[23] who reported a moderate  
23 10  
24 Pearson correlation with the TUG when validating the modified LSA-CI to capture life-space  
25 11  
26 of older adults with mild cognitive impairment during the past week.[23, 30] Previous  
27 12  
28 validation studies have tested their version of the LSA composite score against against the Short  
29 13  
30 Physical Performance Battery as a physical assessment of functional mobility and found  
31 14  
32 moderate to strong association.[12, 27] Furthermore, our results revealed a moderate significant  
33 15  
34 association for self-rated health with the LSA-D composite score in bivariate regression, which  
35 16  
36 is in accordance with the original LSA validation study.[12] However, this association did not  
37 17  
38 remain significant in the adjusted model. Unfortunately, balance confidence as an additional  
39 18  
40 subjective health measure that showed moderate significant bivariate associations could not be  
41 19  
42 included in the adjusted model due to multicollinearity. Our adjusted model confirms the  
43 20  
44 importance of social resources as they can be seen in living together with others in shared living  
45 21  
46 arrangements and functional mobility represented by the significant negative associations with  
47 22  
48 limitations in ADL/iADL activities, time to complete the TUG and a positive history of falls.  
49 23  
50 To test our hypothesis that the LSA-D is applicable in both urban and rural living environments,  
51 24  
52 we calculated separate bivariate regressions for each subsample. The associations were  
53 25  
54  
55  
56  
57  
58  
59  
60

1  
2  
3 1 similarly strong for functional mobility, self-rated health, balance confidence and history of  
4  
5 2 falls. Although a significant association with age was only found for the urban population and  
6  
7 3 limitations in ADL/iADL were not significant in either subsample, our findings generally  
8  
9 4 correspond across both subsamples. This supports our notion that the LSA-D can be used for  
10  
11 5 measurement of life-space mobility during the past four weeks in community dwelling older  
12  
13 6 adults living in both urban and rural areas.  
14  
15  
16  
17

18 7 Contrary to our expectation results of the adjusted model calculated separately for each  
19  
20 8 subsample revealed that limitations in ADL/iADL were only significantly associated with life-  
21  
22 9 space mobility in urban areas. In contrast, shared living arrangements and history of falls were  
23  
24 10 the only significant adjusted factors in rural areas. One possible explanation could be that life-  
25  
26 11 space mobility achieved on one's own ability's is easier to maintain in urban areas with a more  
27  
28 12 pronounced infrastructure. On the contrary a nearby social network may play a more important  
29  
30 13 role for sustaining life-space mobility in rural areas where distances to services and social  
31  
32 14 activities might be longer. This strengthened the importance of social resources on life-space  
33  
34 15 mobility in rural areas. In this regard, Kusipar et al.[5] also found evidence for the importance  
35  
36 16 of social support on life-space mobility in the Canadian Longitudinal Study of Aging. Due to  
37  
38 17 the small sample size our results should be interpreted with caution and additional studies are  
39  
40 18 needed to confirm he observed differences between urban and rural community-dwelling older  
41  
42 19 adults found in our study. Thereby, future studies should continue to establish a theoretical and  
43  
44 20 empirical basis for urban/rural life-space mobility.  
45  
46  
47  
48  
49  
50

51 21 To further determine construct validity of the LSA-D, we investigated the different  
52  
53 22 scoring methods in the total and both subsamples separately. The LS-M differed between urban  
54  
55 23 and rural participants, with those from rural areas reporting higher LS-M than those living in  
56  
57 24 urban surroundings. Older adults living in rural areas might be more dependent on leaving their  
58  
59 25 village or town in order to gain access to health care services or to run routine errands due to  
60

1 the limited infrastructure often found in rural areas. Our results suggest that the LSA-D is a  
2 useful tool for capturing specific characteristics of urban and rural living environments. No  
3 group differences were found concerning the LSA-D composite score and the dichotomized  
4 LS-D scoring method. This demonstrates the ability of the LSA-D composite score and the  
5 dichotomized LS-D score to remain stable and applicable outcome measures in urban and rural  
6 living environments. Taken together, our findings demonstrate robust evidence for a good  
7 construct validity of the LSA-D.

8

### 9 **Strengths and limitations**

10 A main strength of our study is that we tested construct validity of the LSA-D among  
11 urban and rural community-dwelling older adults. As mobility patterns may vary across living  
12 areas, assessments of mobility need to be valid for people living in small villages and large  
13 cities as well. Our findings revealed an urban-rural difference in maximal LS and thus  
14 demonstrate that the LSA-D can detect disparities in individual mobility patterns that are related  
15 to the surrounding living area. These differences must be considered when health care  
16 practitioners or researchers address specific questions about independence, social support and  
17 functional mobility in different regions. Maximal LS measured with the LS-M score is likely  
18 to vary between urban and rural areas and thus may reflect availability of different  
19 environmental resources and social support. Another strength is that we applied advanced  
20 statistical methods including non-parametric bootstrapping procedures and multivariate  
21 regression analysis to account for confounding variables and to estimate the independent  
22 association of each of the variables with LSA-D composite-score. However, there are some  
23 limitations that need to be considered. First, due to the beginning of the Covid-19 pandemic,  
24 we did not reach the planned sample size. However, post-hoc sensitivity analyses revealed a  
25 sufficient statistical power. Second, although statistical power was sufficient and the focus was

1 on community-dwelling older adults, our sample size was rather small and non-representative.  
2  
3  
4  
5  
6  
7  
8  
9  
10  
11  
12  
13  
14  
15  
16  
17  
18  
19  
20  
21  
22  
23  
24  
25  
26  
27  
28  
29  
30  
31  
32  
33  
34  
35  
36  
37  
38  
39  
40  
41  
42  
43  
44  
45  
46  
47  
48  
49  
50  
51  
52  
53  
54  
55  
56  
57  
58  
59  
60

1 on community-dwelling older adults, our sample size was rather small and non-representative.  
2 Future studies should replicate our findings in a representative sample, including different  
3 subgroups of older adults and evaluate additional psychometric properties of the LSA-D as test-  
4 retest reliability and responsiveness. Moreover, future studies should consider the overlap  
5 between LS scoring methods of the LSA-D, social constructs and objectively derived GPS data.  
6 This multimodal approach can lead to a better understanding of complex mobility patterns in  
7 older adults and associated factors.

## 9 **Conclusion**

10 In conclusion, the LSA-D has shown good construct validity and can be used in the  
11 general population of community-dwelling older adults in urban and rural living environments.  
12 The use of LSA-D is recommended for geriatric health care practitioners of different disciplines  
13 to assess mobility in the context of social participation and health service utilization.

## 15 **Acknowledgments**

16 We sincerely thank Patricia Sawyer for her feedback on the pre-final, back translated English  
17 LSA-D version. Also, we would like to thank Monica Schanzer and Rudolf Mörgele for the  
18 back translation of the LSA-D, all participants and all members of the study staff that are not  
19 listed as authors.

20  
21 Figure 1: Distribution of different life-space levels of the LSA-D among the total sample, urban  
22 and rural subsample. LS-M = maximal life-space; LS-E = life-space with equipment; LS-I =  
23 independent life-space



## References

- 1 Webber SC, Porter MM, Menec VH. Mobility in older adults: a comprehensive framework. *Gerontologist* 2010;**50**:443-50.
- 2 Rantakokko M, Wilkie R. The role of environmental factors for the onset of restricted mobility outside the home among older adults with osteoarthritis: a prospective cohort study. *BMJ Open* 2017;**7**:e012826.
- 3 Spaltenstein J, Bula C, Santos-Eggimann B, et al. Factors associated with going outdoors frequently: a cross-sectional study among Swiss community-dwelling older adults. *BMJ Open* 2020;**10**:e034248.
- 4 Giannouli E, Bock O, Mellone S, et al. Mobility in Old Age: Capacity Is Not Performance. *Biomed Res Int* 2016;**2016**:3261567-.
- 5 Kuspinar A, Verschoor CP, Beauchamp MK, et al. Modifiable factors related to life-space mobility in community-dwelling older adults: results from the Canadian Longitudinal Study on Aging. *BMC Geriatr* 2020;**20**:35.
- 6 Portegijs E, Keskinen KE, Tsai L-T, et al. Physical Limitations, Walkability, Perceived Environmental Facilitators and Physical Activity of Older Adults in Finland. *International Journal of Environmental Research and Public Health* 2017;**14**:333.
- 7 May D, Nayak US, Isaacs B. The life-space diary: a measure of mobility in old people at home. *International rehabilitation medicine* 1985;**7**:182-6.
- 8 Taylor JK, Buchan IE, van der Veer SN. Assessing life-space mobility for a more holistic view on wellbeing in geriatric research and clinical practice. *Aging clinical and experimental research* 2019;**31**:439-45.
- 9 Hashidate H, Shimada H, Shiomi T, et al. Measuring indoor life-space mobility at home in older adults with difficulty to perform outdoor activities. *J Geriatr Phys Ther* 2013;**36**:109-14.

1  
2  
3 10 Tinetti ME, Ginter SF. The nursing home life-space diameter. A measure of extent and  
4  
5 frequency of mobility among nursing home residents. *Journal of the American Geriatrics*  
6  
7 *Society* 1990;**38**:1311-5.

8  
9  
10 11 Hauer K, Ullrich P, Heldmann P, et al. Validation of the interview-based life-space  
12  
13 assessment in institutionalized settings (LSA-IS) for older persons with and without cognitive  
14  
15 impairment. *BMC Geriatrics* 2020;**20**:534.

16  
17 18 Baker PS, Bodner EV, Allman RM. Measuring life-space mobility in community-dwelling  
19  
20 older adults. *Journal of the American Geriatrics Society* 2003;**51**:1610-4.

21  
22 23 Kennedy RE, Sawyer P, Williams CP, et al. Life-Space Mobility Change Predicts 6-Month  
24  
25 Mortality. *Journal of the American Geriatrics Society* 2017;**65**:833-8.

26  
27 28 Mackey DC, Cauley JA, Barrett-Connor E, et al. Life-space mobility and mortality in  
29  
30 older men: a prospective cohort study. *Journal of the American Geriatrics Society*  
31  
32 2014;**62**:1288-96.

33  
34 35 Silberschmidt S, Kumar A, Raji MM, et al. Life-Space Mobility and Cognitive Decline  
36  
37 Among Mexican Americans Aged 75 Years and Older. *Journal of the American Geriatrics*  
38  
39 *Society* 2017;**65**:1514-20.

40  
41 42 Lo AX, Rundle AG, Buys D, et al. Neighborhood Disadvantage and Life-Space Mobility  
43  
44 Are Associated with Incident Falls in Community-Dwelling Older Adults. *Journal of the*  
45  
46 *American Geriatrics Society* 2016;**64**:2218-25.

47  
48 49 Portegijs E, Rantakokko M, Viljanen A, et al. Is frailty associated with life-space mobility  
50  
51 and perceived autonomy in participation outdoors? A longitudinal study. *Age Ageing*  
52  
53 2016;**45**:550-3.

54  
55 56 57 Lo AX, Flood KL, Kennedy RE, et al. The Association Between Life-Space and Health Care  
58  
59 Utilization in Older Adults with Heart Failure. *J Gerontol A Biol Sci Med Sci* 2015;**70**:1442-7.  
60

- 1  
2  
3 19 McCrone A, Smith A, Hooper J, et al. The Life-Space Assessment Measure of Functional  
4  
5 Mobility Has Utility in Community-Based Physical Therapist Practice in the United Kingdom.  
6  
7  
8 *Physical Therapy* 2019;**99**:1719-31.  
9
- 10 20 Sartori AC, Wadley VG, Clay OJ, et al. The relationship between cognitive function and  
11  
12 life space: the potential role of personal control beliefs. *Psychology and aging* 2012;**27**:364-  
13  
14 74.  
15
- 16 21 Saajanaho M, Rantakokko M, Portegijs E, et al. Personal goals and changes in life-space  
17  
18 mobility among older people. *Preventive medicine* 2015;**81**:163-7.  
19
- 20 22 Curcio CL, Alvarado BE, Gomez F, et al. Life-Space Assessment scale to assess mobility:  
21  
22 validation in Latin American older women and men. *Aging clinical and experimental research*  
23  
24 2013;**25**:553-60.  
25  
26  
27  
28  
29
- 30 23 Ullrich P, Werner C, Bongartz M, et al. Validation of a Modified Life-Space Assessment  
31  
32 in Multimorbid Older Persons With Cognitive Impairment. *Gerontologist* 2019;**59**:e66-e75.  
33
- 34 24 Auger C, Demers L, Gelinas I, et al. Development of a French-Canadian version of the  
35  
36 Life-Space Assessment (LSA-F): content validity, reliability and applicability for power mobility  
37  
38 device users. *Disability and rehabilitation Assistive technology* 2009;**4**:31-41.  
39
- 40 25 Miyashita T, Tadaka E, Arimoto A. Cross-sectional study of individual and  
41  
42 environmental factors associated with life-space mobility among community-dwelling  
43  
44 independent older people. *Environmental Health and Preventive Medicine* 2021;**26**:9.  
45  
46  
47  
48
- 49 26 Tseng YC, Gau BS, Lou MF. Validation of the Chinese version of the Life-Space  
50  
51 Assessment in community-dwelling older adults. *Geriatr Nurs* 2020;**41**:381-6.  
52  
53
- 54 27 Fristedt S, Kammerlind AS, Bravell ME, et al. Concurrent validity of the Swedish version  
55  
56 of the life-space assessment questionnaire. *BMC Geriatr* 2016;**16**:181.  
57  
58  
59  
60

1  
2  
3 28 Pedersen MM, Kjaer-Sorensen P, Midtgaard J, et al. A Danish version of the life-space  
4 assessment (LSA-DK) - translation, content validity and cultural adaptation using cognitive  
5 interviewing in older mobility limited adults. *BMC Geriatr* 2019;**19**:312.  
6  
7

8  
9  
10 29 Hauer K, Ullrich P, Heldmann P, et al. Psychometric Properties of the Proxy-Reported  
11 Life-Space Assessment in Institutionalized Settings (LSA-IS-Proxy) for Older Persons with and  
12 without Cognitive Impairment. *International journal of environmental research and public*  
13 *health* 2021;**18**:3872.  
14  
15  
16  
17

18  
19  
20 30 Ullrich P, Eckert T, Bongartz M, et al. Life-space mobility in older persons with cognitive  
21 impairment after discharge from geriatric rehabilitation. *Archives of gerontology and*  
22 *geriatrics* 2019;**81**:192-200.  
23  
24  
25  
26

27  
28 31 Auais M, Alvarado B, Guerra R, et al. Fear of falling and its association with life-space  
29 mobility of older adults: a cross-sectional analysis using data from five international sites. *Age*  
30 *Ageing* 2017;**46**:459-65.  
31  
32  
33

34  
35 32 Faul F, Erdfelder E, Buchner A, et al. Statistical power analyses using G\*Power 3.1: tests  
36 for correlation and regression analyses. *Behavior research methods* 2009;**41**:1149-60.  
37  
38

39  
40 33 WHO. Process of translation and adaption of instruments.  
41 [https://www.who.int/substance\\_abuse/research\\_tools/translation/en/](https://www.who.int/substance_abuse/research_tools/translation/en/) 2008.  
42  
43

44  
45 34 Forsyth BHK, Martha Stapelton; Lawrence, Deidre; Levine, Kerry; Willis Gorgon B.  
46 Methods for Translating Survey Questionnaires. *American Association for Public Opinion*  
47 *Research* 2006.  
48  
49

50  
51  
52 35 Einig K, Zaspel-Heisters B. Das System Zentraler Orte in Deutschland. In: Flex F, Greiving  
53 S, eds. *Neuaufstellung des Zentrale-Orte Konzepts in Nordrhein-Westfalen*. Hannover: Verlag  
54 des ARL 2016.  
55  
56  
57  
58  
59  
60

- 1  
2  
3 36 Ritchie CS, Locher JL, Roth DL, et al. Unintentional weight loss predicts decline in  
4  
5 activities of daily living function and life-space mobility over 4 years among community-  
6  
7 dwelling older adults. *J Gerontol A Biol Sci Med Sci* 2008;**63**:67-75.  
8  
9
- 10 37 Sheppard KD, Sawyer P, Ritchie CS, et al. Life-space mobility predicts nursing home  
11  
12 admission over 6 years. *Journal of aging and health* 2013;**25**:907-20.  
13  
14
- 15 38 Borsch-Supan A, Brandt M, Hunkler C, et al. Data Resource Profile: the Survey of  
16  
17 Health, Ageing and Retirement in Europe (SHARE). *Int J Epidemiol* 2013;**42**:992-1001.  
18  
19
- 20 39 Turner G, Clegg A. Best practice guidelines for the management of frailty: a British  
21  
22 Geriatrics Society, Age UK and Royal College of General Practitioners report. *Age and Ageing*  
23  
24 2014;**43**:744-7.  
25  
26
- 27 40 Podsiadlo D, Richardson S. The timed "Up & Go": a test of basic functional mobility for  
28  
29 frail elderly persons. *Journal of the American Geriatrics Society* 1991;**39**:142-8.  
30  
31
- 32 41 Lin MR, Hwang HF, Hu MH, et al. Psychometric comparisons of the timed up and go,  
33  
34 one-leg stand, functional reach, and Tinetti balance measures in community-dwelling older  
35  
36 people. *Journal of the American Geriatrics Society* 2004;**52**:1343-8.  
37  
38
- 39 42 Donoghue OA, Savva GM, Cronin H, et al. Using timed up and go and usual gait speed  
40  
41 to predict incident disability in daily activities among community-dwelling adults aged 65 and  
42  
43 older. *Archives of physical medicine and rehabilitation* 2014;**95**:1954-61.  
44  
45
- 46 43 Ludwig K, Graf von der Schulenburg JM, Greiner W. German Value Set for the EQ-5D-  
47  
48 5L. *PharmacoEconomics* 2018;**36**:663-74.  
49  
50
- 51 44 Schott N. Reliability and validity of the German short version of the Activities specific  
52  
53 Balance Confidence (ABC-D6) scale in older adults. *Archives of gerontology and geriatrics*  
54  
55 2014;**59**:272-9.  
56  
57  
58  
59  
60

- 1  
2  
3 45 Buchner DM, Hornbrook MC, Kutner NG, et al. Development of the common data base  
4  
5 for the FICSIT trials. *Journal of the American Geriatrics Society* 1993;**41**:297-308.  
6  
7  
8 46 Sousa-Santos AR, Amaral TF. Differences in handgrip strength protocols to identify  
9  
10 sarcopenia and frailty - a systematic review. *BMC Geriatr* 2017;**17**:238.  
11  
12  
13 47 Charlson ME, Pompei P, Ales KL, et al. A new method of classifying prognostic  
14  
15 comorbidity in longitudinal studies: development and validation. *Journal of chronic diseases*  
16  
17 1987;**40**:373-83.  
18  
19  
20 48 Borson S, Scanlan J, Brush M, et al. The mini-cog: a cognitive 'vital signs' measure for  
21  
22 dementia screening in multi-lingual elderly. *International journal of geriatric psychiatry*  
23  
24 2000;**15**:1021-7.  
25  
26  
27 49 Hesterberg TMDSM, S. ; Clipson, A. ; Epstein, R. Bootstrap methods and permutation  
28  
29 tests. In: A. MDSMGPCB, ed. *Intoduction to practice of statistics*. New York: Palgrave  
30  
31 Macmillan 2007.  
32  
33  
34  
35 50 Rasch D, Kubinger KD, Moder K. The two-sample t test: pre-testing its assumptions  
36  
37 does not pay off. *Statistical Papers* 2011;**52**:219-31.  
38  
39  
40  
41  
42  
43  
44  
45  
46  
47  
48  
49  
50  
51  
52  
53  
54  
55  
56  
57  
58  
59  
60

## 1 **Footnotes**

2  
3  
4  
5  
6  
7  
8  
9  
10  
11  
12  
13  
14  
15  
16  
17  
18  
19  
20  
21  
22  
23  
24  
25  
26  
27  
28  
29  
30  
31  
32  
33  
34  
35  
36  
37  
38  
39  
40  
41  
42  
43  
44  
45  
46  
47  
48  
49  
50  
51  
52  
53  
54  
55  
56  
57  
58  
59  
60

2 **Contributors:** JK developed the first draft of the study. JK, SAM and PG planned and  
3 conducted the final study protocol. JK and SAM translated LSA into German, compiled the final  
4 version of the LSA-D, and contributed in recruiting and testing participants. SAM drafted the  
5 manuscript and conducted the major analyses. MS drafted tables and the figure. PG established  
6 the statistical analysis plan and performed the sample size and power calculation. MS assisted  
7 with data analyses and interpretation of the results. JLOS gave advice and commented on the  
8 manuscript. All authors critically reviewed the manuscript and approved the final version.

9 **Funding:** The study was partly financed by the “MOBILE”-Project funded by the Federal  
10 Ministry of Education and Research (BMBF; ID 01GY1803) and the Institute of Medical  
11 Sociology and Rehabilitation Science, Charité – Universitätsmedizin Berlin. We acknowledge  
12 support from the German Research Foundation (DFG) and the Open Access Publication Fund  
13 of Charité – Universitätsmedizin Berlin.

14 **Competing Interests:** Non declared.

15 **Patient consent for publication:** Not required

16 **Patient and public involvement:** Patients and/or the public were not involved in the design,  
17 or conduct, or reporting, or dissemination plans of this research.

18 **Ethical approval:** Ethics approval for the study was provided by the Ethics Committee of  
19 Charité – Universitätsmedizin Berlin (Rec. Reference EA2/124/19).

20 **Data availability statement:** Data will be made available on reasonable, methodologically  
21 sound request as soon as possible to achieve the aims of the approved proposal.

22 Available data includes individual participant data that underlies the results reported in this  
23 article after its deidentification, data dictionary and the analytical code.

24 Data will be available at least 3 months after, and ending 5 years following article publication.

25 Proposals should be directed at [sandra.muemken@charite.de](mailto:sandra.muemken@charite.de) or [joern.kiselev@charite.de](mailto:joern.kiselev@charite.de)

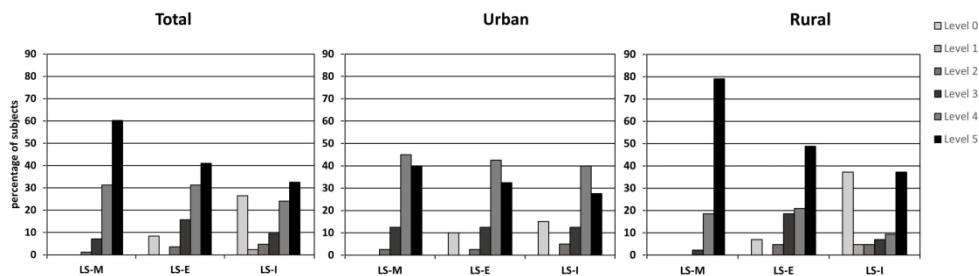

Distribution of different life-space levels of the LSA-D among the total sample, urban and rural subsample.  
 LS-M = maximal life-space; LS-E = life-space with equipment; LS-I = independent life-space

209x69mm (400 x 400 DPI)



## German Life-Space-Assessment LSA-D

| DIE NÄCHSTEN FRAGEN BEZIEHEN SICH AUF IHRE AKTIVITÄTEN IN DEN LETZTEN VIER WOCHEN:                                                                          |  |  | A. WIE HÄUFIG WAREN SIE IN DEN LETZTEN 4 WOCHEN IN (Name des Life-Space-Levels)?<br>Häufigkeit |                          |                             |                          | WIE SIND SIE DORT HINGEKOMMEN?                      |                          |                          |                                                         |                          |                          |                              |                          |  |
|-------------------------------------------------------------------------------------------------------------------------------------------------------------|--|--|------------------------------------------------------------------------------------------------|--------------------------|-----------------------------|--------------------------|-----------------------------------------------------|--------------------------|--------------------------|---------------------------------------------------------|--------------------------|--------------------------|------------------------------|--------------------------|--|
|                                                                                                                                                             |  |  |                                                                                                |                          |                             |                          | B. HABEN SIE HILFSMITTEL ODER AUSRÜSTUNG VERWENDET? |                          |                          | C. BENÖTIGTEN SIE DAFÜR DIE HILFE EINER ANDEREN PERSON? |                          |                          |                              |                          |  |
| WAREN SIE IN DEN LETZTEN 4 WOCHEN...                                                                                                                        |  |  | Ja                                                                                             | Nein                     | Weniger als 1 mal die Woche | 1-3 mal die Woche        | 4-6 mal die Woche                                   | Täglich                  | Ja                       | Nein                                                    | Unbekannt / keine Angabe | Ja                       | Nein                         | Unbekannt / keine Angabe |  |
| IN ANDEREN RÄUMEN IHRES ZUHAUSES außer dem Raum, in dem Sie schlafen?<br><i>LIFE-SPACE 1</i>                                                                |  |  | <b>LS1</b>                                                                                     | <input type="checkbox"/> | <input type="checkbox"/>    | <b>LS1-Häufigkeit</b>    |                                                     |                          |                          | <b>LS1-Hilfsmittel</b>                                  |                          |                          | <b>LS1-Persönliche Hilfe</b> |                          |  |
|                                                                                                                                                             |  |  | <input type="checkbox"/>                                                                       | <input type="checkbox"/> | <input type="checkbox"/>    | <input type="checkbox"/> | <input type="checkbox"/>                            | <input type="checkbox"/> | <input type="checkbox"/> | <input type="checkbox"/>                                | <input type="checkbox"/> | <input type="checkbox"/> | <input type="checkbox"/>     | <input type="checkbox"/> |  |
| IN DER NÄHEREN UMGEBUNG AUSSERHALB IHRER WOHNUNG (Hausflur, Terrasse, Balkon, Fahrstuhl, Hof, Garage, hauseigener Garten, Auffahrt)?<br><i>LIFE-SPACE 2</i> |  |  | <b>LS2</b>                                                                                     | <input type="checkbox"/> | <input type="checkbox"/>    | <b>LS2-Häufigkeit</b>    |                                                     |                          |                          | <b>LS2-Hilfsmittel</b>                                  |                          |                          | <b>LS2-Persönliche Hilfe</b> |                          |  |
|                                                                                                                                                             |  |  | <input type="checkbox"/>                                                                       | <input type="checkbox"/> | <input type="checkbox"/>    | <input type="checkbox"/> | <input type="checkbox"/>                            | <input type="checkbox"/> | <input type="checkbox"/> | <input type="checkbox"/>                                | <input type="checkbox"/> | <input type="checkbox"/> | <input type="checkbox"/>     | <input type="checkbox"/> |  |
| AN ORTEN IN IHRER NACHBARSCHAFT, aber außerhalb Ihrer Wohnung oder Ihrer näheren Wohnumgebung?<br><i>LIFE-SPACE 3</i>                                       |  |  | <b>LS3</b>                                                                                     | <input type="checkbox"/> | <input type="checkbox"/>    | <b>LS3-Häufigkeit</b>    |                                                     |                          |                          | <b>LS3-Hilfsmittel</b>                                  |                          |                          | <b>LS3-Persönliche Hilfe</b> |                          |  |
|                                                                                                                                                             |  |  | <input type="checkbox"/>                                                                       | <input type="checkbox"/> | <input type="checkbox"/>    | <input type="checkbox"/> | <input type="checkbox"/>                            | <input type="checkbox"/> | <input type="checkbox"/> | <input type="checkbox"/>                                | <input type="checkbox"/> | <input type="checkbox"/> | <input type="checkbox"/>     | <input type="checkbox"/> |  |
| AN ORTEN AUSSERHALB IHRER NACHBARSCHAFT, aber innerhalb der Stadt oder der Ortschaft, in der Sie leben?<br><i>LIFE-SPACE 4</i>                              |  |  | <b>LS4</b>                                                                                     | <input type="checkbox"/> | <input type="checkbox"/>    | <b>LS4-Häufigkeit</b>    |                                                     |                          |                          | <b>LS4-Hilfsmittel</b>                                  |                          |                          | <b>LS4-Persönliche Hilfe</b> |                          |  |
|                                                                                                                                                             |  |  | <input type="checkbox"/>                                                                       | <input type="checkbox"/> | <input type="checkbox"/>    | <input type="checkbox"/> | <input type="checkbox"/>                            | <input type="checkbox"/> | <input type="checkbox"/> | <input type="checkbox"/>                                | <input type="checkbox"/> | <input type="checkbox"/> | <input type="checkbox"/>     | <input type="checkbox"/> |  |
| AN ORTEN AUSSERHALB DER STADT ODER DER ORTSCHAFT, in der Sie leben?<br><i>LIFE-SPACE 5</i>                                                                  |  |  | <b>LS5</b>                                                                                     | <input type="checkbox"/> | <input type="checkbox"/>    | <b>LS5-Häufigkeit</b>    |                                                     |                          |                          | <b>LS5-Hilfsmittel</b>                                  |                          |                          | <b>LS5-Persönliche Hilfe</b> |                          |  |
|                                                                                                                                                             |  |  | <input type="checkbox"/>                                                                       | <input type="checkbox"/> | <input type="checkbox"/>    | <input type="checkbox"/> | <input type="checkbox"/>                            | <input type="checkbox"/> | <input type="checkbox"/> | <input type="checkbox"/>                                | <input type="checkbox"/> | <input type="checkbox"/> | <input type="checkbox"/>     | <input type="checkbox"/> |  |
