# Supplementary material for: Validation of the German Life-Space Assessment (LSA-D): cross-sectional validation study in urban and rural community-dwelling older adults
Source: HighWire-hosted journal article supplement (doi:10.1136/bmjopen-2021-049926), 2021-07-01
Supplement: bmjopen-2021-049926supp001_data_supplement.pdf [file bmjopen-2021-049926supp001_data_supplement.pdf]

## German Life-Space-Assessment LSA-D

| DIE NÄCHSTEN FRAGEN BEZIEHEN SICH AUF IHRE AKTIVITÄTEN IN DEN LETZTEN VIER WOCHEN:                                                                          |            | A. WIE HÄUFIG WAREN SIE IN DEN LETZTEN 4 WOCHEN IN (Name des Life-Space-Levels)?<br>Häufigkeit |                          |                             |                          | WIE SIND SIE DORT HINGEKOMMEN?                      |                          |                                                         |                          |                          |                          |
|-------------------------------------------------------------------------------------------------------------------------------------------------------------|------------|------------------------------------------------------------------------------------------------|--------------------------|-----------------------------|--------------------------|-----------------------------------------------------|--------------------------|---------------------------------------------------------|--------------------------|--------------------------|--------------------------|
|                                                                                                                                                             |            |                                                                                                |                          |                             |                          | B. HABEN SIE HILFSMITTEL ODER AUSRÜSTUNG VERWENDET? |                          | C. BENÖTIGTEN SIE DAFÜR DIE HILFE EINER ANDEREN PERSON? |                          |                          |                          |
| WAREN SIE IN DEN LETZTEN 4 WOCHEN...                                                                                                                        |            | Ja                                                                                             | Nein                     | Weniger als 1 mal die Woche | 1-3 mal die Woche        | 4-6 mal die Woche                                   | Täglich                  | Unbekannt / keine Angabe                                | Unbekannt / keine Angabe |                          |                          |
| IN ANDEREN RÄUMEN IHRES ZUHAUSES außer dem Raum, in dem Sie schlafen?<br><i>LIFE-SPACE 1</i>                                                                | <b>LS1</b> | <input type="checkbox"/>                                                                       | <input type="checkbox"/> | <input type="checkbox"/>    | <input type="checkbox"/> | <input type="checkbox"/>                            | <input type="checkbox"/> | <input type="checkbox"/>                                | <input type="checkbox"/> | <input type="checkbox"/> | <input type="checkbox"/> |
| IN DER NÄHEREN UMGEBUNG AUSSERHALB IHRER WOHNUNG (Hausflur, Terrasse, Balkon, Fahrstuhl, Hof, Garage, hauseigener Garten, Auffahrt)?<br><i>LIFE-SPACE 2</i> | <b>LS2</b> | <input type="checkbox"/>                                                                       | <input type="checkbox"/> | <input type="checkbox"/>    | <input type="checkbox"/> | <input type="checkbox"/>                            | <input type="checkbox"/> | <input type="checkbox"/>                                | <input type="checkbox"/> | <input type="checkbox"/> | <input type="checkbox"/> |
| AN ORTEN IN IHRER NACHBARSCHAFT, aber außerhalb Ihrer Wohnung oder Ihrer näheren Wohnumgebung?<br><i>LIFE-SPACE 3</i>                                       | <b>LS3</b> | <input type="checkbox"/>                                                                       | <input type="checkbox"/> | <input type="checkbox"/>    | <input type="checkbox"/> | <input type="checkbox"/>                            | <input type="checkbox"/> | <input type="checkbox"/>                                | <input type="checkbox"/> | <input type="checkbox"/> | <input type="checkbox"/> |
| AN ORTEN AUSSERHALB IHRER NACHBARSCHAFT, aber innerhalb der Stadt oder der Ortschaft, in der Sie leben?<br><i>LIFE-SPACE 4</i>                              | <b>LS4</b> | <input type="checkbox"/>                                                                       | <input type="checkbox"/> | <input type="checkbox"/>    | <input type="checkbox"/> | <input type="checkbox"/>                            | <input type="checkbox"/> | <input type="checkbox"/>                                | <input type="checkbox"/> | <input type="checkbox"/> | <input type="checkbox"/> |
| AN ORTEN AUSSERHALB DER STADT ODER DER ORTSCHAFT, in der Sie leben?<br><i>LIFE-SPACE 5</i>                                                                  | <b>LS5</b> | <input type="checkbox"/>                                                                       | <input type="checkbox"/> | <input type="checkbox"/>    | <input type="checkbox"/> | <input type="checkbox"/>                            | <input type="checkbox"/> | <input type="checkbox"/>                                | <input type="checkbox"/> | <input type="checkbox"/> | <input type="checkbox"/> |
